# Supplementary material for: Repurposing a peptide antibiotic as a catalyst: a multicopper–daptomycin complex as a cooperative O–O bond formation and activation catalyst
Source: Royal Society of Chemistry journal article supplement (doi:10.1039/d2qi01440h), 2022-01-01
Supplement: d2qi01440h1.pdf [file d2qi01440h1.pdf]

## Electronic Supplementary Information

# Repurposing a peptide antibiotic as a catalyst: multicopper–daptomycin complex as a cooperative O–O bond formation and activation catalyst

Yen Jea Lee,<sup>a,†</sup> Haesol Kim,<sup>b,†</sup> Yujeong Kim,<sup>c, d, †</sup> Kang Hee Cho,<sup>e, †</sup> Sugyeong Hong,<sup>c, d</sup> Ki Tae Nam,<sup>e, \*</sup> Sun Hee Kim,<sup>c, d, \*</sup> Chang Hyuck Choi,<sup>f, \*</sup> and Jiwon Seo<sup>a, \*</sup>

<sup>a</sup> Department of Chemistry, <sup>b</sup> School of Materials Science and Engineering, Gwangju Institute of Science and Technology, Gwangju 61005, Republic of Korea

<sup>c</sup> Western Seoul Center, Korea Basic Science Institute, Seoul 03759, Republic of Korea

<sup>d</sup> Department of Chemistry and Nano Science, Ewha Womans University, Seoul 03760, Republic of Korea

<sup>e</sup> Department of Materials Science and Engineering, Seoul National University, Seoul 08826, Republic of Korea

<sup>f</sup> Department of Chemistry, Pohang University of Science and Technology, Pohang 37673, Republic of Korea

†These authors contributed equally to this work.

### \*Corresponding author:

Jiwon Seo, Ph.D. (email: [jseo@gist.ac.kr](mailto:jseo@gist.ac.kr))

Chang Hyuck Choi, Ph.D. (email: [chchoi@postech.ac.kr](mailto:chchoi@postech.ac.kr))

Sun Hee Kim, Ph.D. (email: [shkim7@kbsi.re.kr](mailto:shkim7@kbsi.re.kr))

Ki Tae Nam, Ph.D. (email: [nkitae@snu.ac.kr](mailto:nkitae@snu.ac.kr))

## Table of Contents

|                                                                                                                                  |     |
|----------------------------------------------------------------------------------------------------------------------------------|-----|
| 1. Materials .....                                                                                                               | S3  |
| 2. General methods .....                                                                                                         | S4  |
| 3. Preparation of the Cu <sub>n</sub> -daptomycin complex .....                                                                  | S6  |
| 4. Job plot .....                                                                                                                | S7  |
| 5. Cu(II) binding constant of Cu <sub>n</sub> -dap complexes .....                                                               | S8  |
| 6. Kinetic study of daptomycin linearization .....                                                                               | S10 |
| 7. ESI-HRMS analysis of Cu <sub>n</sub> -dap complexes .....                                                                     | S13 |
| 8. Electron paramagnetic resonance (EPR) spectroscopy .....                                                                      | S17 |
| 9. Evans method .....                                                                                                            | S23 |
| 10. Synthesis of the tetra-methyl ester derivative of daptomycin .....                                                           | S24 |
| 11. Comparison between daptomycin and the tetra-methyl ester derivative <b>5</b> in metallation .....                            | S27 |
| 12. Cu(0/I/II) redox state assignment of Cu <sub>n</sub> -dap complexes .....                                                    | S28 |
| 13. Ascorbic acid oxidation .....                                                                                                | S33 |
| 14. 2,6-Dimethoxyphenol oxidation .....                                                                                          | S36 |
| 15. O <sub>2</sub> evolution measurement during H <sub>2</sub> O <sub>2</sub> disproportionation with Cu <sub>n</sub> -dap. .... | S38 |
| 16. Hydroxyl radical detection using 2,7-dichlorofluorescein diacetate .....                                                     | S40 |
| 17. Electrochemical analysis .....                                                                                               | S43 |
| 18. Differential pulse voltammetry (DPV) .....                                                                                   | S45 |
| 19. The scan rate dependence of observed currents with Cu <sub>4</sub> -dap in CV .....                                          | S46 |
| 20. Faradaic efficiency evaluation during water electrolysis .....                                                               | S47 |
| 21. <i>In situ</i> UV-vis spectroscopy .....                                                                                     | S50 |
| 22. <i>In situ</i> Raman spectroscopy .....                                                                                      | S51 |
| 23. Kinetic isotope effect in CV measurement .....                                                                               | S54 |
| 24. A plausible reaction pathway for O–O bond formation mediated by Cu <sub>4</sub> -dap .....                                   | S54 |
| 25. References .....                                                                                                             | S55 |



## 1. Materials

The solvents and reagents were purchased from commercial vendors and used without further purification. Daptomycin, tetraglycine, trisodium nitrilotriacetate monohydrate, H<sub>2</sub>O<sub>2</sub> (35% wt in H<sub>2</sub>O) and NaOH were purchased from TCI, Tokyo, Japan. CuCl<sub>2</sub>, NiCl<sub>2</sub>·6H<sub>2</sub>O, CoCl<sub>2</sub>·6H<sub>2</sub>O, FeCl<sub>2</sub>, Fe(NO<sub>3</sub>)<sub>3</sub>·9H<sub>2</sub>O, MnCl<sub>2</sub>·4H<sub>2</sub>O, HCl (37% wt in H<sub>2</sub>O), sodium phosphate dibasic, triglycine, ascorbic acid (Acs), 2,6-dimethoxyphenol (DMP), di-*tert*-butyl dicarbonate (Boc<sub>2</sub>O), anhydrous MeOH, anhydrous CH<sub>2</sub>Cl<sub>2</sub>, 4-(dimethylamino)pyridine (DMAP), 2',7'-dichlorofluorescein diacetate (DCFH-DA), and H<sub>2</sub><sup>18</sup>O were purchased from Sigma Aldrich, MO, USA. D<sub>2</sub>O was purchased from Cambridge Isotope Laboratories, Inc., MA, USA. Pivalic anhydride was purchased from Alfa Aesar, MA, USA. CH<sub>3</sub>CN (HPLC grade), *N,N*-dimethylformamide (DMF) and trifluoroacetic acid (TFA) were purchased from Thermo Fisher Scientific, NH, USA. Ultrapure water (> 18.2 MΩ, aqua MAX<sup>TM</sup>-Ultra 370 series, YOUNGLIN) was used to prepare the HPLC eluent or metal-peptide complex for spectroscopy and electrochemical analysis.

## 2. General methods

### 2.1. Absorption/fluorescence spectroscopy

The UV-vis spectra were obtained by using an Ultrospec 2100 pro UV-vis spectrophotometer (GE Healthcare, Buckinghamshire, UK) with a 1 cm path-length quartz cuvette at room temperature. For the kinetic study, Infinite 200Pro (Tecan, Männedorf, CH) equipped with Tecan *i*-control was used for the absorbance with a quartz or polypropylene 96-well plate. A Synergy H1 microplate plate reader (BioTek Instruments Inc., VT, USA) with a 96-well microplate was used to record fluorescence spectra.

### 2.2. High-performance liquid chromatography (HPLC)

For the HPLC analysis, a Waters HPLC system (Waters Corporation, MA, USA) equipped with a reversed-phase (RP) column (SunFire C18, 4.6 × 250 mm, 5 μm), Waters 2489 UV/Visible detector, Waters 1525 Binary HPLC Pump, Waters 2707 Autosampler, and Waters 5CH column oven was used. The detector was set to monitor sample elution at 220 nm. The mobile phases were H<sub>2</sub>O (A, +0.1% TFA) and CH<sub>3</sub>CN (B, +0.1% TFA). The column oven temperature was 40 °C. A Waters preparative HPLC system (Waters PrepLC system, Waters 2489 UV/Visible detector, and Waters fraction collector III) was used to purify a peptide with a C<sub>18</sub> preparative HPLC column (SunFire C18, 19 x 150 mm, 5 μm). HPLC gradient methods; **method 1**: eluent gradient was held at 5% B for 2 min and ramped to 100% over 30 min with a flow rate of 1 mL/min; **method 2**: eluent gradient was held at 5% B for 5 min and ramped to 100% over 20 min with a flow rate of 14 mL/min.

### 2.3. Ultra-performance liquid chromatography (UPLC)

A Waters Acquity UPLC system (Waters Corp., MA, USA) was used to analyze peptoid oligomers. The Waters UPLC system was equipped with a reverse-phase column (Acquity UPLC® BEH C<sub>18</sub> 1.7 μm, 2.1 × 50 mm), Acquity-TUV Detector, Acquity-Solvent Manager

FTN-H, and Acquity-Quaternary Solvent Manager. The mobile phases were water (A, 0.1% TFA, v/v) and acetonitrile (ACN) (B, 0.1% TFA, v/v). The flow rate was 0.6 mL/min. The chromatograms were recorded with a detection wavelength at 220 nm. The following conditions were used for peptoid sample analysis. The column was preheated at 40 °C. Before the sample injection, the column was conditioned with 5% of B. After the sample injection (2  $\mu$ L), 5% B was kept for 1 min, and the linear gradient of 5–60% of B was applied for 7 min.

#### **2.4. Liquid chromatography-mass spectrometry (LC-MS)**

The mass data of the peptides were obtained using an Agilent LC-MS system (Agilent Technologies, Inc., CA, USA) equipped with a 1260 Infinity LC and 6120 SQ bundle system with an API-electrospray ion source.

### 3. Preparation of the Cu<sub>n</sub>-daptomycin complex

Daptomycin (dap, 1 μmol) was dissolved in Na<sub>2</sub>HPO<sub>4</sub> buffer (0.1M, pH 11.5, 0.9 mL). To the daptomycin solution were added corresponding equivalent of CuCl<sub>2</sub> (1.0 M stock solution in H<sub>2</sub>O). Then pH was adjusted to pH 11.5 using NaOH (1.0 M, aq) to compensate the pH drop due to CuCl<sub>2</sub> addition. The resulting solution volume was made up to 1 mL with the buffer to afford Cu<sub>n</sub>-dap solution (1 mM). The prepared solution was mixed on a 2-D orbital shaker with 140 rpm shaking overnight. Then, using centrifugation at 10,000 rpm for 5 min, Cu precipitate, expected as Cu(OH)<sub>2</sub> or Cu<sub>3</sub>(PO<sub>4</sub>)<sub>2</sub>, removed, since when over 4 equiv CuCl<sub>2</sub> was added, there is apparent blue precipitates as shown in Figure S1. Linear daptomycin was obtained by incubating daptomycin (1 mM) in Na<sub>2</sub>HPO<sub>4</sub> buffer (0.1 M, pH 11.5) at 4 °C for 12 h (Figure S2).

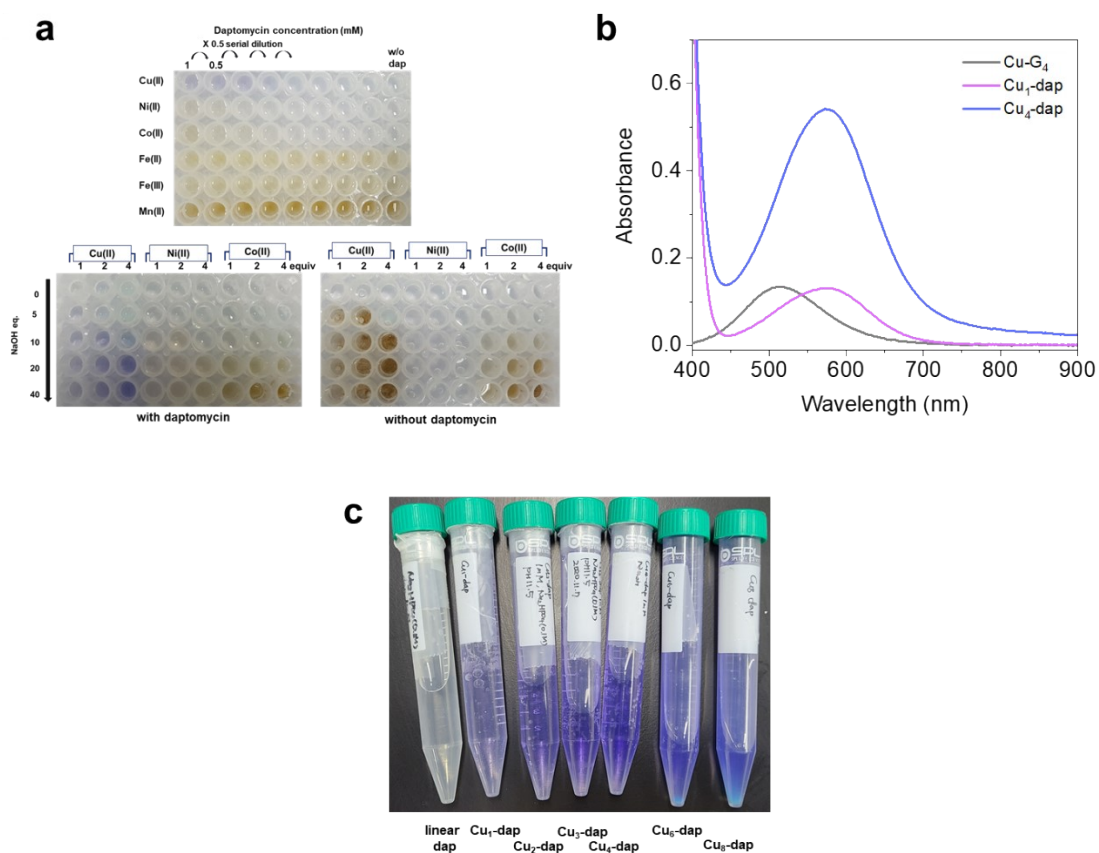

Figure S1. (a) Screening of metal-binding between daptomycin and redox-active metals

(Cu(II), Ni(II), Co(II), Fe(II), Fe(III), and Mn(II)). (top) The complexation was tested in  $\text{Na}_2\text{HPO}_4$  buffer (0.1 M, pH 11.5), in the presence of metal salt (1 mM, used metal salts:  $\text{CuCl}_2$ ,  $\text{NiCl}_2 \cdot 6\text{H}_2\text{O}$ ,  $\text{CoCl}_2 \cdot 6\text{H}_2\text{O}$ ,  $\text{FeCl}_2$ ,  $\text{Fe}(\text{NO}_3)_3 \cdot 9\text{H}_2\text{O}$ , and  $\text{MnCl}_2 \cdot 4\text{H}_2\text{O}$ ) and daptomycin. The highest concentration of daptomycin was 1 mM, and it was serially diluted with a factor of 0.5). (bottom) Screening of the complexation between daptomycin (1 mM) and three different metal salts (Cu(II), Ni(II), and Co(II); 1, 2, and 4 equivalents were added.) under the addition of five different equivalents of NaOH (0, 5, 10, 20, and 40 equiv) in water. Distinct color change upon Cu(II)–daptomycin complexation was observed. (b) UV-vis spectra of Cu-peptide complexes (1 mM) in sodium phosphate buffer (0.1 M, pH 11.5,  $I = 0.44$  M). (c) Photographs of  $\text{Cu}_n$ –dap solutions (1 mM) in  $\text{Na}_2\text{HPO}_4$  buffer (0.1 M, pH 11.5,  $I = 0.44$  M).

#### 4. Job plot

Job plot, or continuous variation method was used to investigate the binding stoichiometry of the complexation between Cu(II) and daptomycin. The total concentration of  $[\text{CuCl}_2]$  and  $[\text{daptomycin}]$  was fixed to 1 mM in  $\text{Na}_2\text{HPO}_4$  buffer (0.1 M, 500  $\mu\text{L}$ , pH 11.5,  $I = 0.44$  M) at 25 °C. The molar fraction of Cu(II) was varied from 0 to 1. The absorbance at 576 nm was measured using a UV-vis spectrophotometer with an 1 cm path-length cuvette and plotted along with a molar fraction of Cu(II). The maximum of the absorbance was observed at a molar fraction of Cu(II) of 0.79 in Figure 2b, which indicated that the preferred binding mode is 4:1 (Cu(II):daptomycin).



## 5. Cu(II) binding constant of Cu<sub>n</sub>-dap complexes

A competitive ligand for Cu(II), nitrilotriacetic acid (NTA), was used to evaluate a binding constant for the outermost Cu site of each Cu<sub>n</sub>-dap (n = 1–4). The apparent binding affinity of NTA for Cu(II) was calculated using the IUPAC stability constant database (Mini-SCDatabase) built in SolEq software (Academic software, Otley, UK).<sup>1</sup> Ionic strength (based on the Davis equation) and temperature dependence (based on the Van't Hoff equation) for the binding constants were calculated using SolEq software. At pH 11.5, the calculated pK<sub>app</sub> of NTA for Cu(II) is 14.6 at 25 °C (*I* = 0.44 M). The spectrophotometric titration data was obtained by measuring the characteristic absorbance of Cu-NTA at 800 nm using a TECAN microplate reader. NTA stock solution (20 mM) was titrated into Cu<sub>n</sub>-dap solution (1 mM, 200 μL) in Na<sub>2</sub>HPO<sub>4</sub> buffer. All measurements were triplicated for each complex. From the standard curve plotting the measured absorbance versus Cu-NTA (μmol) (Fig. S3(a)), we calculated the existing Cu-NTA during titration. Based on Eq. S1–5, the Cu binding constant of the outermost Cu(II) site was calculated as shown in Table S1.

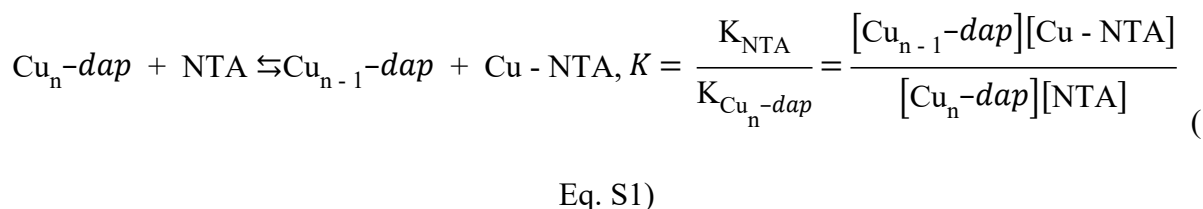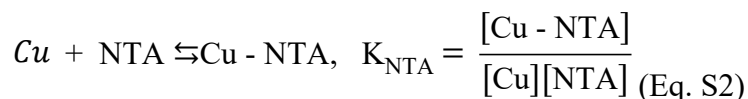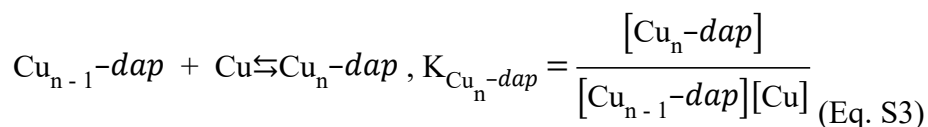

$$K = \frac{K_{\text{NTA}}}{K_{\text{Cu}_n\text{-dap}}}, K_{\text{Cu}_n\text{-dap}} = \frac{1}{K} K_{\text{NTA}}, \quad (\text{Eq. S4})$$

$$\text{when } [\text{Cu} - \text{NTA}] = [\text{Cu}_n\text{-dap}], K = \frac{K_{\text{NTA}}}{K_{\text{Cu}_n\text{-dap}}} = \frac{[\text{Cu} - \text{NTA}]}{[\text{NTA}]} = \frac{[\text{Cu} - \text{NTA}]}{[\text{NTA}]_0 - [\text{Cu} - \text{NTA}]} \quad (\text{Eq. S5})$$

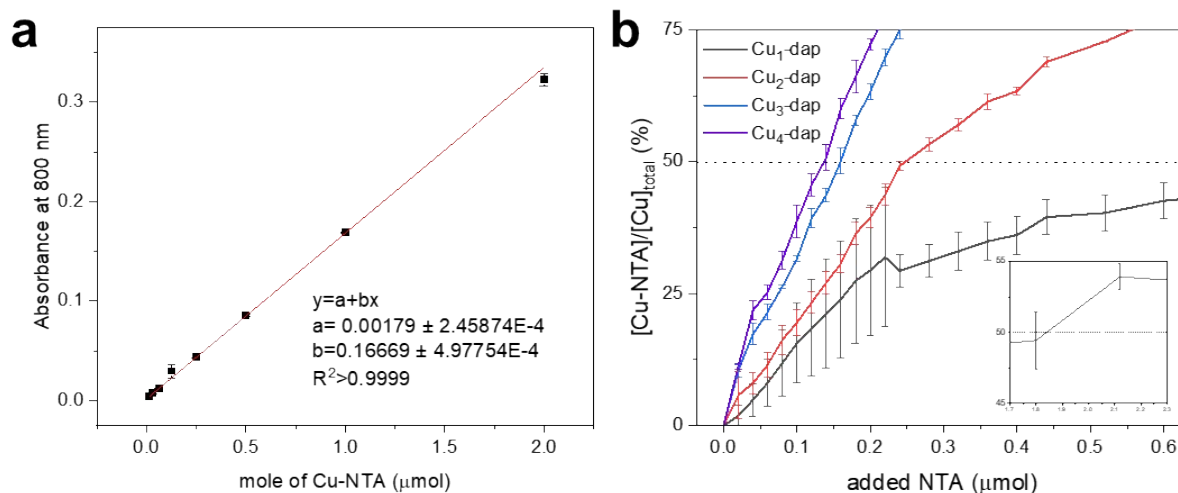

**Figure S2.** (a) The obtained standard curve plotting absorbance at 800 nm versus Cu-NTA (μmol). (b) The formation of Cu-NTA complex (%) versus added NTA to calculate the binding constant during titrations. The error bars were calculated from the triplicated experiments.

**Table S1.** The calculated relative Cu(II) binding constants.<sup>a</sup>

|                                           | Cu <sub>1</sub> -dap | Cu <sub>2</sub> -dap | Cu <sub>3</sub> -dap | Cu <sub>4</sub> -dap |
|-------------------------------------------|----------------------|----------------------|----------------------|----------------------|
| $\log^{[10]}(K_{\text{Cu}_n\text{-dap}})$ | $15.7 \pm 0.16$      | $14.8 \pm 0.03$      | $14.4 \pm 0.04$      | $13.8 \pm 0.28$      |

<sup>a</sup> Standard deviation values were calculated from triplicated experiments.

## 6. Kinetic study of daptomycin linearization

Daptomycin (1 mM, 200  $\mu$ L) with or without 4 equivalents of Cu(II) ions was incubated in  $\text{Na}_2\text{HPO}_4$  buffer (0.1 M, pH 11.5,  $I = 0.44$  M) at 25  $^\circ\text{C}$ . The alkaline hydrolysis of the depsipeptide was stopped by diluting the reaction mixture (10  $\mu$ L) with HCl (0.1 M (aq), 290  $\mu$ L), and then, the solution was analyzed by UPLC with a detection wavelength of  $\lambda = 220$  nm (Fig. S4 and S5). The obtained UPLC peaks were integrated at each eluted time, and the peak area was plotted versus time. The stability of the peptide is greatly enhanced upon binding with copper ions.

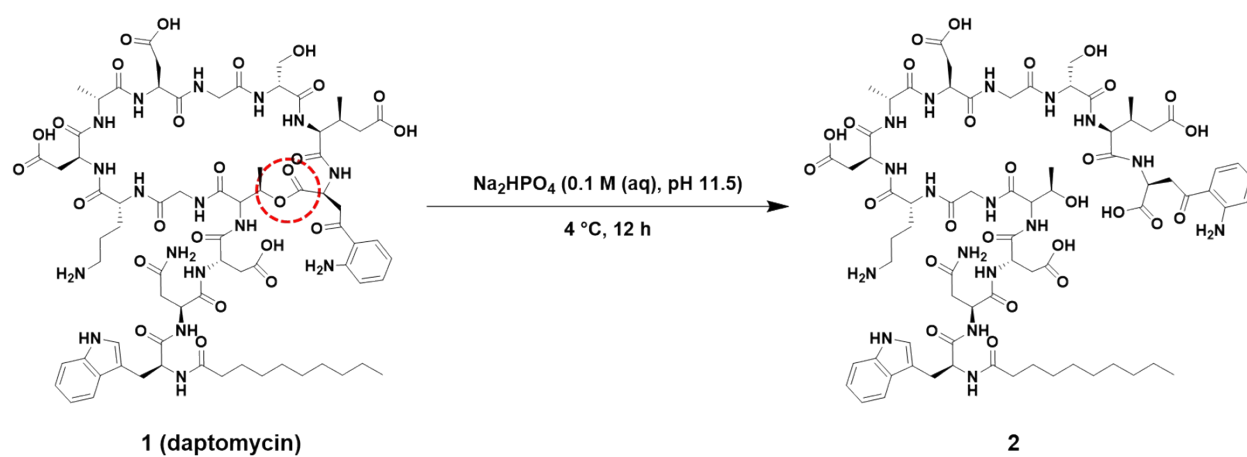

**Figure S3.** Hydrolysis of daptomycin in alkaline conditions.

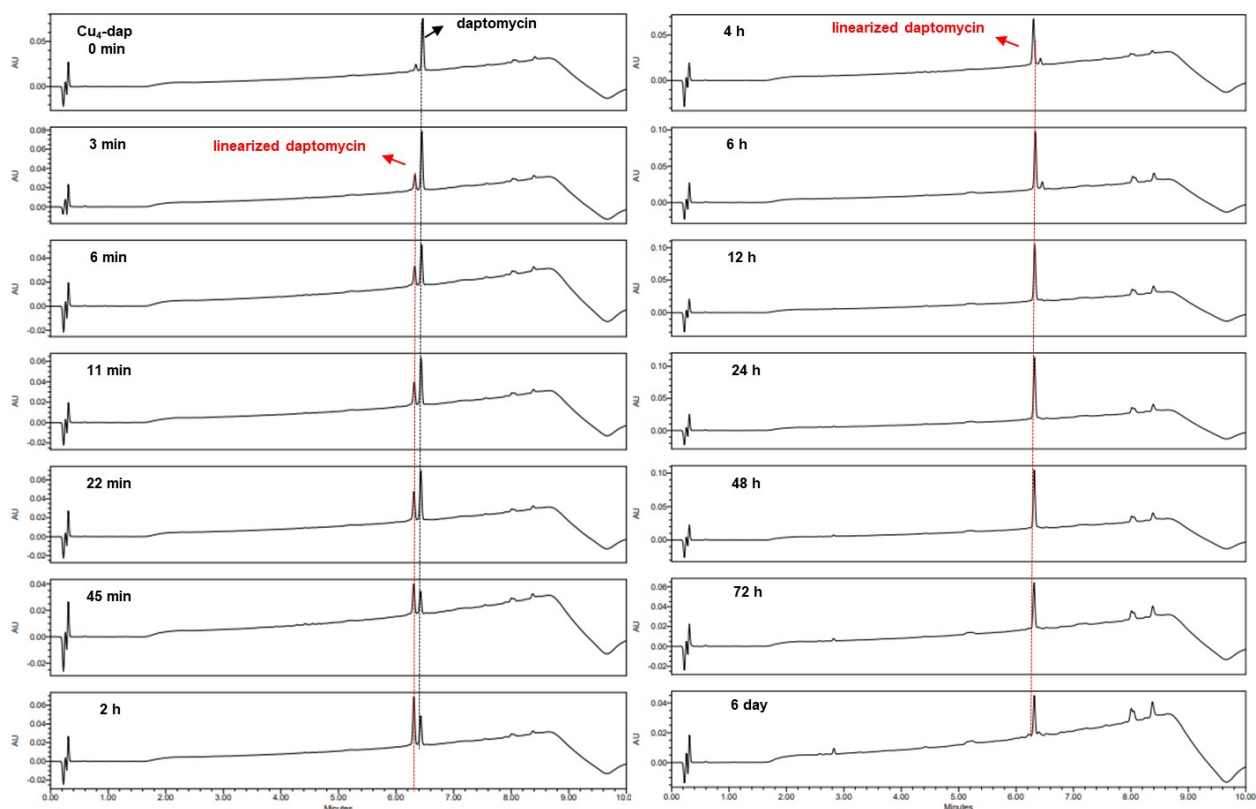

**Figure S4.** UPLC traces of daptomycin in the presence of 4 equiv of Cu(II). Daptomycin (**1**,  $t_R = 6.3$  min) and linearized daptomycin (**2**,  $t_R = 6.4$  min) were observed with UPLC at  $\lambda = 220$  nm (see page S5 for the UPLC mobile phase conditions).

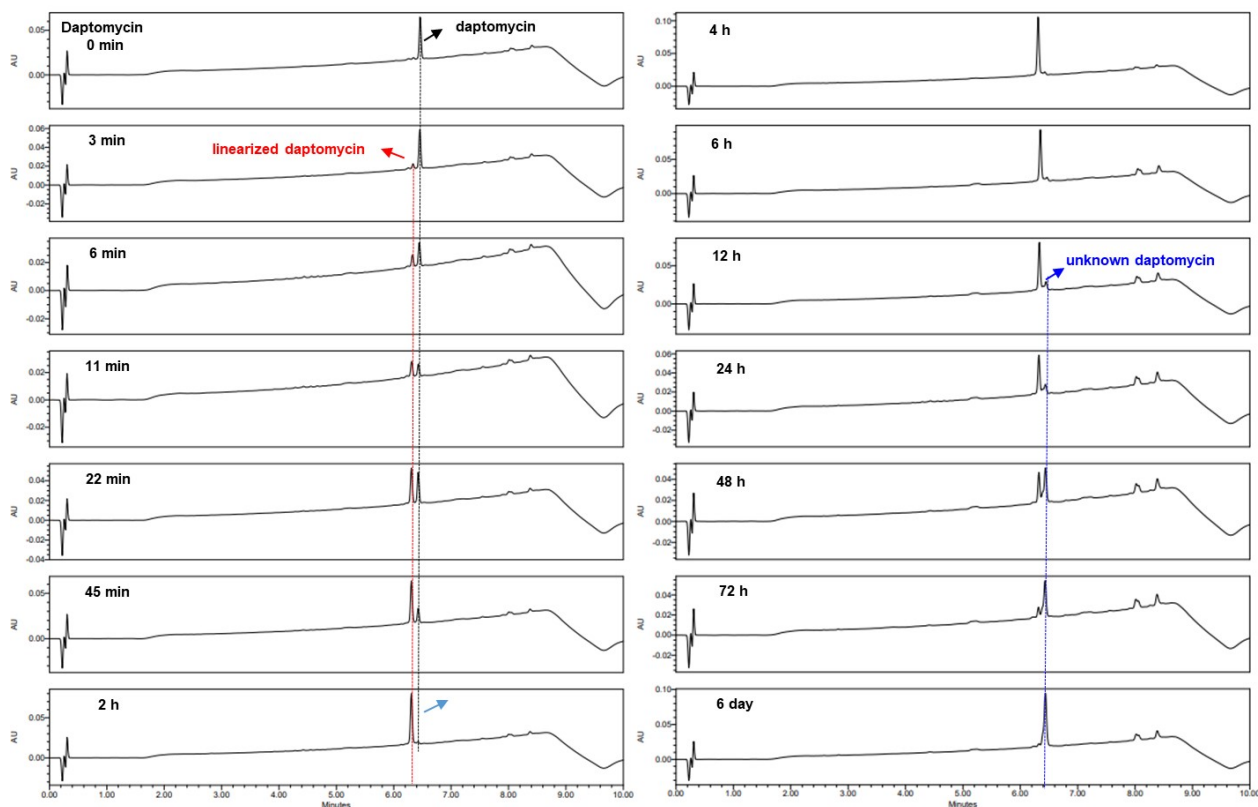

**Figure S5.** UPLC traces of daptomycin without Cu(II). Daptomycin (**1**,  $t_R = 6.4$  min), linearized daptomycin (**2**,  $t_R = 6.3$  min), and an unknown degradation product ( $t_R = 6.4$  min) were observed with UPLC at  $\lambda = 220$  nm (see page S5 for the UPLC mobile phase conditions).

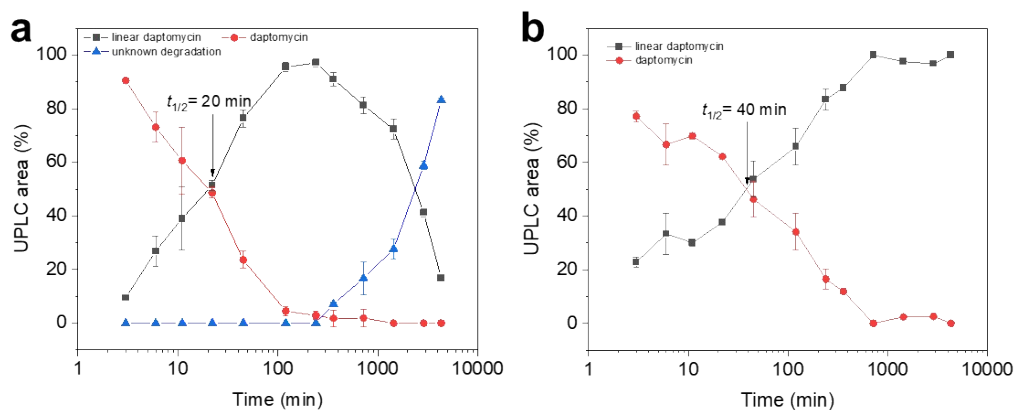

**Figure S6.** Kinetic study of daptomycin linearization. Ratio (%) of UPLC peak area at each retention time was plotted versus time: (a) without Cu(II) and (b) with 4 equiv of Cu(II). Error bars indicate the standard deviation from three independent experiments.

## 7. ESI-HRMS analysis of Cu<sub>n</sub>-dap complexes

Samples for ESI-HRMS containing daptomycin (1 mM) and CuCl<sub>2</sub> (1–4 mM) were prepared by adjusting pH up to 11.5 with concentrated NH<sub>4</sub>OH (aq) at 25 °C. The prepared Cu<sub>n</sub>-dap (n = 1–4) samples were injected to a LTQ Orbitrap XL mass spectrometer (ThermoFisher Scientific, MA, USA) with a flow rate of 20 μL/min. The mass was detected in negative ion mode. The mass data analysis including isotope simulation was carried out using

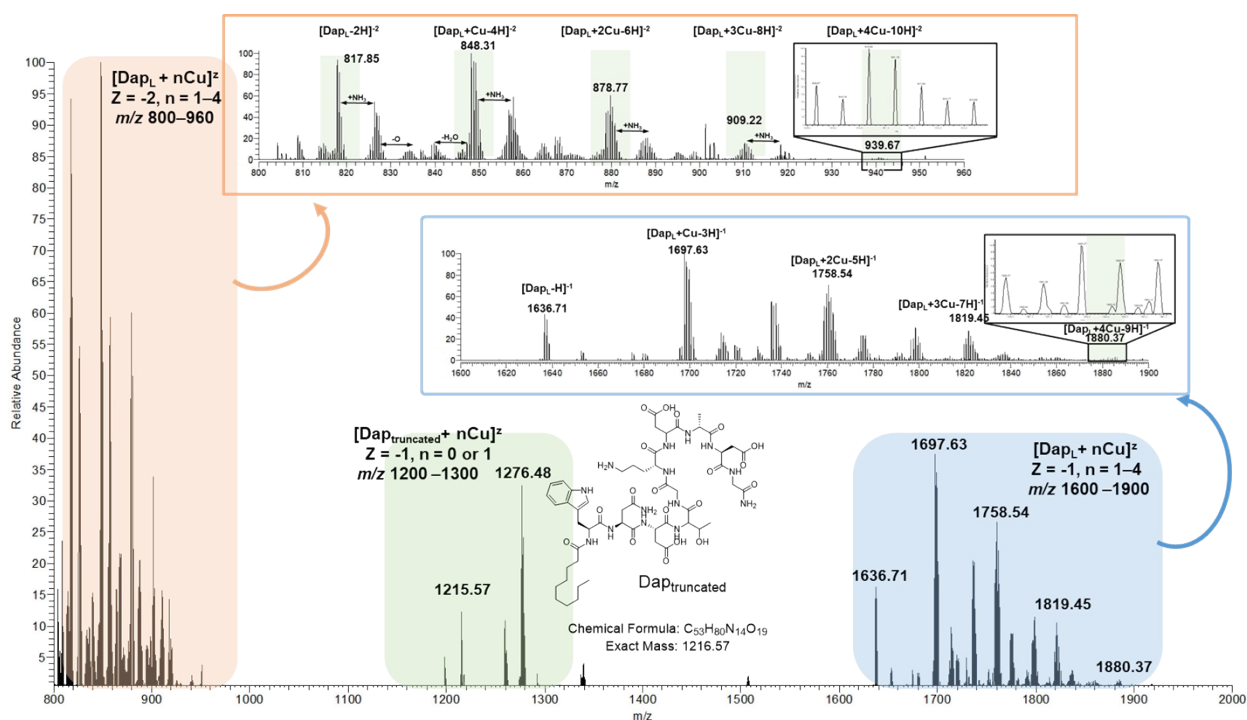

**Figure S7.** ESI-HRMS data of Cu<sub>4</sub>-dap complex. Dap<sub>L</sub> and Dap<sub>truncated</sub> indicate linearized daptomycin and truncated peptide, respectively, in negative ion mode. In the range of 1600 – 1900 m/z, distinct peaks are assigned as the following species: 1636.71 [Dap<sub>L</sub>-H]<sup>-1</sup>, 1697.63 [Dap<sub>L</sub>+Cu-3H]<sup>-1</sup>, 1758.54 [Dap<sub>L</sub>+2Cu-5H]<sup>-1</sup>, 1819.45 [Dap<sub>L</sub>+3Cu-7H]<sup>-1</sup>, and 1880.37 [Dap<sub>L</sub>+4Cu-9H]<sup>-1</sup>.

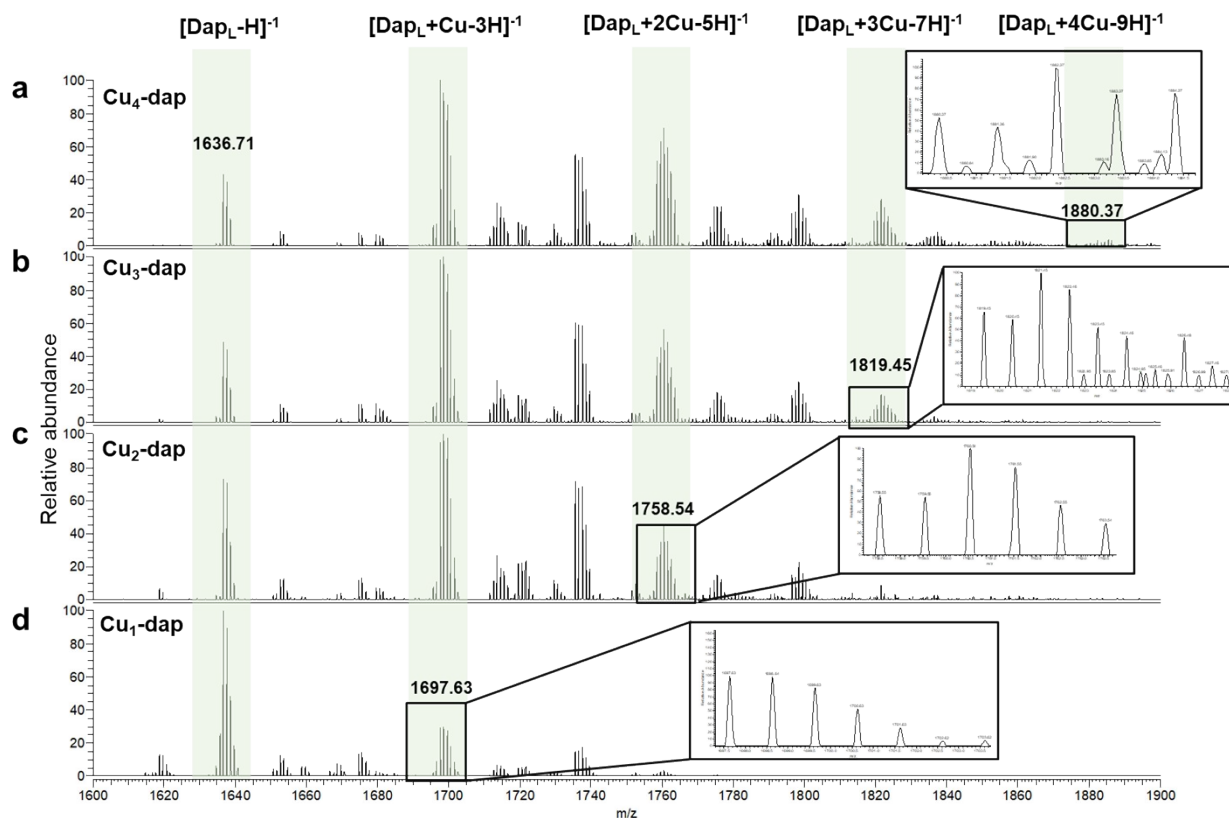

**Figure S8.** ESI-HRMS data of singly charged negative species of  $\text{Cu}_n\text{-dap}$  ( $n = 1-4$ ) complexes in the range of 1600-1900  $m/z$ . Each mass spectrum was obtained by injection of (a)  $\text{Cu}_1\text{-dap}$ , (b)  $\text{Cu}_2\text{-dap}$ , (c)  $\text{Cu}_2\text{-dap}$ , and (d)  $\text{Cu}_4\text{-dap}$  (1 mM in  $\text{H}_2\text{O}$ , pH 11.5, titrated with  $\text{NH}_4\text{OH}$  solution).

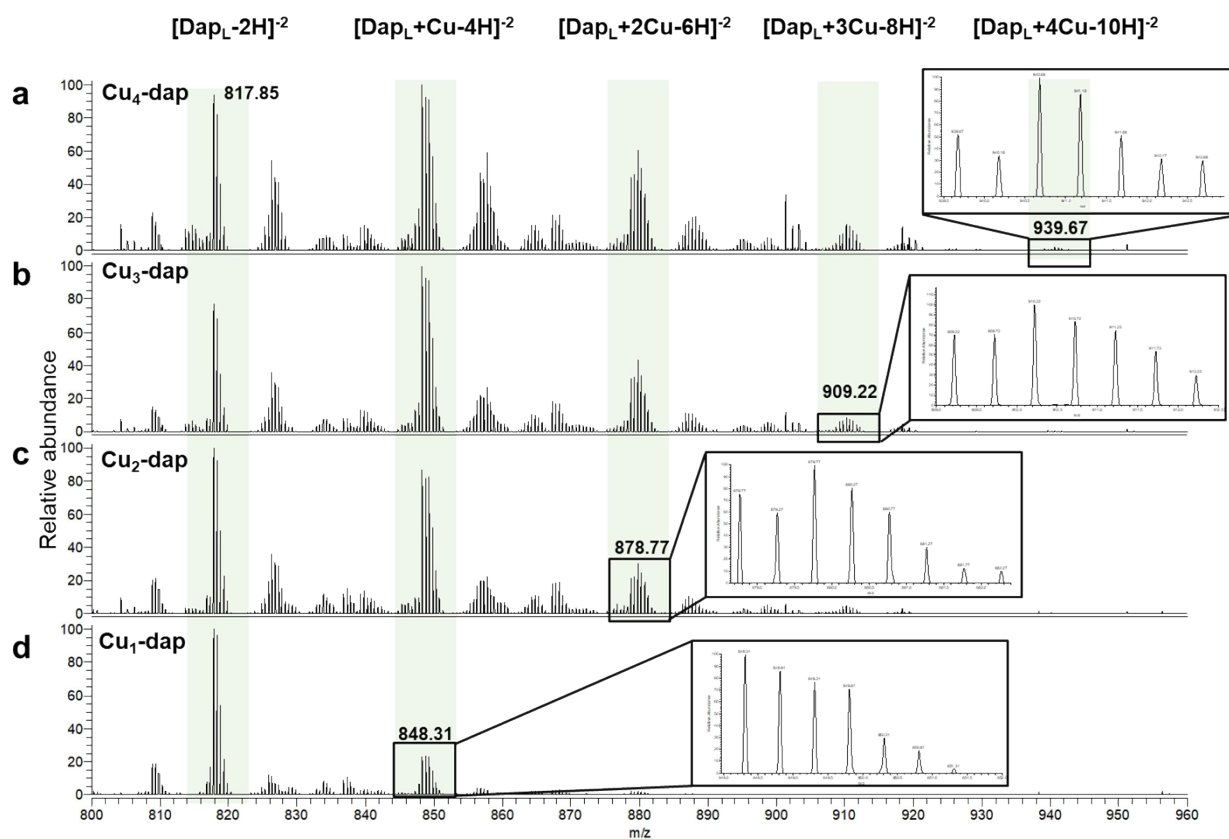

**Figure S9.** ESI-HRMS data of doubly charged negative species of  $\text{Cu}_n\text{-dap}$  ( $n = 1\text{--}4$ ) complexes in the range of 800-960  $m/z$ . Each mass spectrum was obtained by injection of (a)  $\text{Cu}_1\text{-dap}$ , (b)  $\text{Cu}_2\text{-dap}$ , (c)  $\text{Cu}_2\text{-dap}$ , and (d)  $\text{Cu}_4\text{-dap}$  (1 mM in  $\text{H}_2\text{O}$ , pH 11.5, titrated with  $\text{NH}_4\text{OH}$  solution).



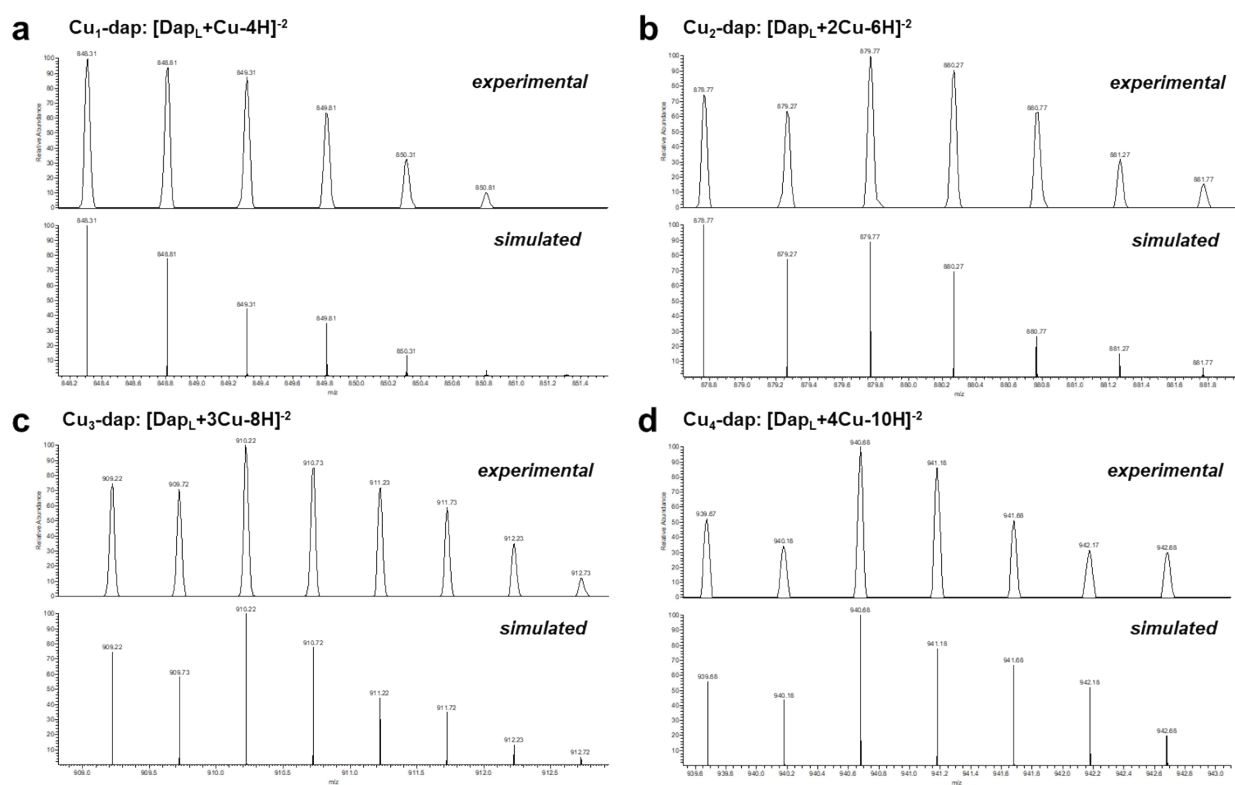

**Figure S10.** ESI-HRMS analysis of  $\text{Cu}_n\text{-dap}$  ( $n = 1\text{--}4$ ) complexes. The observed (top) and simulated isotopic patterns (bottom) for each mass spectrum of doubly charged negative ions: (a)  $\text{Cu}_1\text{-dap}$ , (b)  $\text{Cu}_2\text{-dap}$ , (c)  $\text{Cu}_2\text{-dap}$ , and (d)  $\text{Cu}_4\text{-dap}$ . The simulated isotopic patterns were obtained using Xcalibur software (ThermoFisher Scientific, MA, USA).

## 8. Electron paramagnetic resonance (EPR) spectroscopy

### 8.1. Continuous wave (CW)-EPR spectroscopy

For EPR spectroscopy, Cu<sub>n</sub>-dap complexes (1 mM in Na<sub>2</sub>HPO<sub>4</sub> buffer (0.08 M) with 20% glycerol) were prepared following the procedure described below. All the EPR measurements were carried out at the Western Seoul Center, Korea Basic Science Institute (KBSI) in Seoul, Korea. The CW X-band (9.6 GHz) EPR spectra were collected using a Bruker EMX plus 6/1 spectrometer equipped with an Oxford Instrument ESR900 liquid He cryostat using an Oxford ITC 503 temperature controller. All the spectra were collected with the following experimental parameters: microwave frequency, 9.6 GHz; microwave power, 0.05 mW; modulation frequency, 100 kHz; modulation amplitude, 10 G; time constant, 40.96 ms; 2 scans; temperature, 20 K.

### 8.2. Pulse EPR spectroscopy

Q-band (33.9 GHz) pulse EPR data were obtained on a Bruker Elexsys E580 spectrometer using an EN5107D2 resonator and Cryogenic temperatures were achieved with an Oxford CF-935 cryostat and Oxford ITC temperature controller. The measurements were conducted at 15 K. The ESE-EPR spectra were acquired using a pulse sequence,  $\pi/2$ - $\tau$ - $\pi$ -echo, with a pulse length  $t_{\pi/2} = 32$  ns,  $t_{\pi} = 64$  ns and  $\tau = 200$  ns. The Davies electron nuclear double resonance (ENDOR) were performed using the  $\pi$ - $T$ - $\pi/2$ - $\tau$ - $\pi$ -echo, with microwave pulse lengths of  $t_{\pi/2} = 32$  ns,  $t_{\pi} = 64$  ns and an inter-pulse time of  $\tau = 200$  ns. In this sequence, the RF power was applied during the time  $T$  (20  $\mu$ s) to drive nuclear spin transitions. The repetition time was 5 ms. The Mims ENDOR were performed using the  $\pi/2$ - $\tau$ - $\pi/2$ - $T$ - $\pi/2$ -echo, with microwave pulse lengths of  $t_{\pi/2} = 32$  ns and an inter-pulse time of  $\tau = 200$  ns. In this sequence, the RF power was applied during the time  $T$  (20  $\mu$ s) to drive nuclear spin transitions. The repetition time was 2 ms. All ENDOR spectra were collected by stochastic sampling for a better baseline of the spectra. All simulations of the EPR spectra were performed using Easyspin.<sup>3</sup>

### 8.3. Analysis of EPR spectra

The X-band continuous wave (CW) EPR of Cu<sub>n</sub>-dap (Figures 2c and S11) displays an axial signal and the Q-band electron spin echo (ESE)-detected EPR spectrum shows the corresponding g tensor,  $g = [2.198, 2.041, 2.041]$  (Figure S12). In the  $g_{\parallel}$ , the signal with the hyperfine coupling of Cu( $I=3/2$ )  $A_{\parallel}(\text{Cu})$  presents  $\sim 590$  MHz. The most apparent feature of the spectrum is a superhyperfine structure of ligand, which is characterized by nitrogen nuclei ( $^{14}\text{N}$ ,  $I=1$ ). In the  $g_{\perp}$ , the splitting of nine lines can be assigned to an equivalent of 4 nitrogens ( $2*n*I+1$ ,  $n=4$ ), where the averaging splitting is  $\sim 17$  G, also confirmed by 33.9 GHz field-dependent  $^{14}\text{N}$  ENDOR (Figure S14). In  $g_{\parallel}$ , the triplet ENDOR pattern of the spectrum can be assigned to the overlapped doublets that are centered at  $A/2$  (21 MHz) and separated by  $3P$  (6 MHz) and twice the  $^{14}\text{N}$  Larmor frequency (7 MHz). In the simulations of the ENDOR spectra, the hyperfine coupling parameters of nitrogens were obtained  $A(^{14}\text{N}) = [17.0, 14.5, 14.5]$  G and it is simultaneously well-matched on the CW-EPR. From overall multi-frequency/pulsed EPR results, it was characterized that the 4 equivalent nitrogens are coordinated to the central Cu(II) ion in the local geometries of the Cu<sub>n</sub>-dap.

33.9 GHz ENDOR measurements were performed with Cu<sub>n</sub>-dap ( $n = 1$  and  $4$ ) solution prepared in H<sub>2</sub>O and D<sub>2</sub>O to investigate the proton of the axially coordinated ligand. The  $^1\text{H}$  Davies ENDOR spectra of Cu<sub>4</sub>-dap in H<sub>2</sub>O show several doublets centered at the  $^1\text{H}$  Larmor frequency with a hyperfine coupling constant of  $\sim 10$  MHz (Figure S15).  $^1\text{H}$  Davies ENDOR measurements of the sample prepared in D<sub>2</sub>O were also conducted to examine whether an exchangeable proton was present (Figure S16). The ENDOR peak of the weakly coupled proton signal with  $\sim 5$  MHz was decreased, which indicated that these peaks arise from the exchangeable proton.  $^2\text{H}$  Mims ENDOR measurements of D<sub>2</sub>O were further carried out to confirm the exchangeable proton. Noticeable doublet features centered at the  $^2\text{H}$  Larmor

frequency are shown on the  $^2\text{H}$  Mims ENDOR spectra with  $A(^2\text{H}) \sim 1$  MHz. The hyperfine coupling of  $^2\text{H}$  Mims ENDOR signals matches the difference in the  $^1\text{H}$  Davies ENDOR signal scaled by a gyromagnetic ratio ( $\nu_{\text{H}}/\nu_{\text{D}}$ ) of 6.51. In further analysis of the field-dependent  $^2\text{H}$  Mims ENDOR experiments with exchangeable deuterium (Figure S15b), the detailed hyperfine coupling parameters were obtained with a tensor of  $^2\text{H}$ ,  $A(^2\text{H}) = [-0.6, 1.5, 1.5]$  MHz with the Euler angle of  $[\alpha, \beta, \gamma] = [0, 0, -]^\circ$  in the g-tensor frame, which indicated that the proton was positioned perpendicular to the plane. These features of the exchangeable proton were also shown in  $\text{Cu}_1\text{-dap}$  and  $\text{Cu}_4\text{-dap}$ , which explains that the exchangeable proton was axially bound to each Cu of  $\text{Cu}_n\text{-dap}$ , and expected to be OH or  $\text{H}_2\text{O}$  from solvent media.

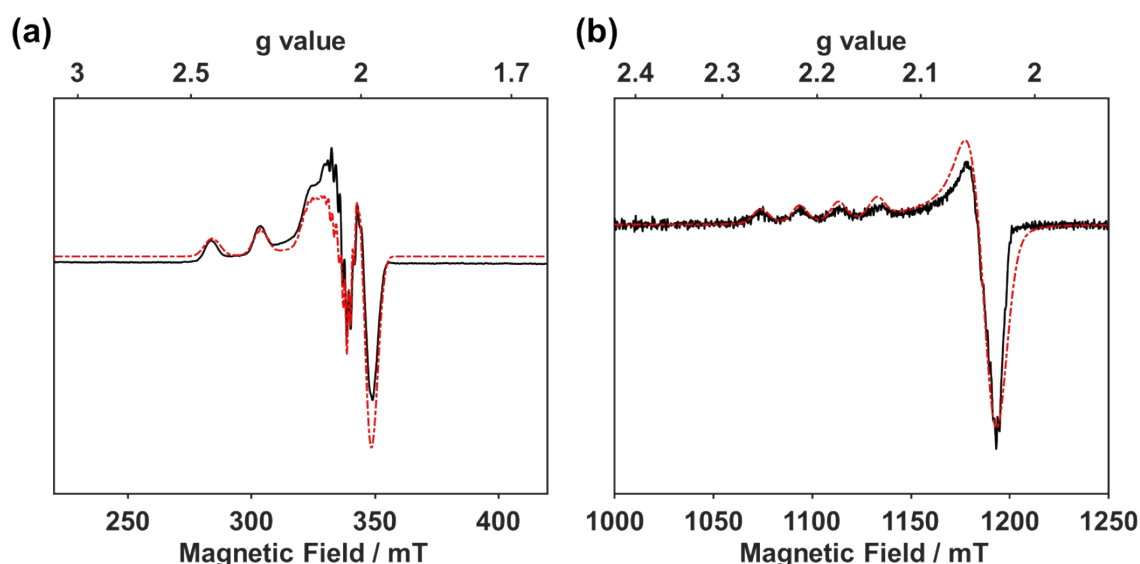

**Figure S11.** (a) 9.6 GHz CW-EPR and (b) 33.9 GHz ESE-EPR (derivative) spectra of  $\text{Cu}_4\text{-dap}$  (black lines) and the simulated spectra (red dashed lines). Experimental parameters: (a) Microwave frequency, 9.6 GHz; microwave power, 0.05 mW; modulation frequency, 100 kHz; modulation amplitude, 10 G; time constant, 40.96 ms; 2 scans; temperature, 20 K. (b) Microwave frequency, 33.9 GHz; pulse sequence, 32-64 ns; inter-pulse time ( $\tau$ ), 400 ns; temperature, 20 K. Simulation parameters:  $g = [2.198, 2.042, 2.042]$ ,  $A(\text{Cu}) = [210, 30, 30]$  G,  $A(^{14}\text{N}) = [17.0, 14.5, 14.5]$  G.

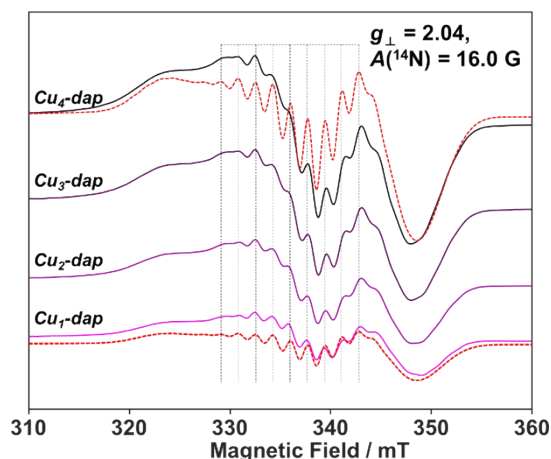

**Figure S12.** EPR spectra of  $\text{Cu}_n\text{-dap}$  in the  $g_{\perp}$  region and the simulated spectra of  $\text{Cu}_1\text{-dap}$  and  $\text{Cu}_4\text{-dap}$  (red dashed lines). Experimental parameters: Microwave frequency, 9.6 GHz; microwave power, 0.05 mW; modulation frequency, 100 kHz; modulation amplitude, 10 G; time constant, 40.96 ms; 2 scans; temperature, 20 K. Simulation parameters:  $g = [2.198, 2.042, 2.042]$ ,  $A(\text{Cu}) = [210, 30, 30]$  G,  $A(^{14}\text{N}) = [17.0, 14.5, 14.5]$  G.

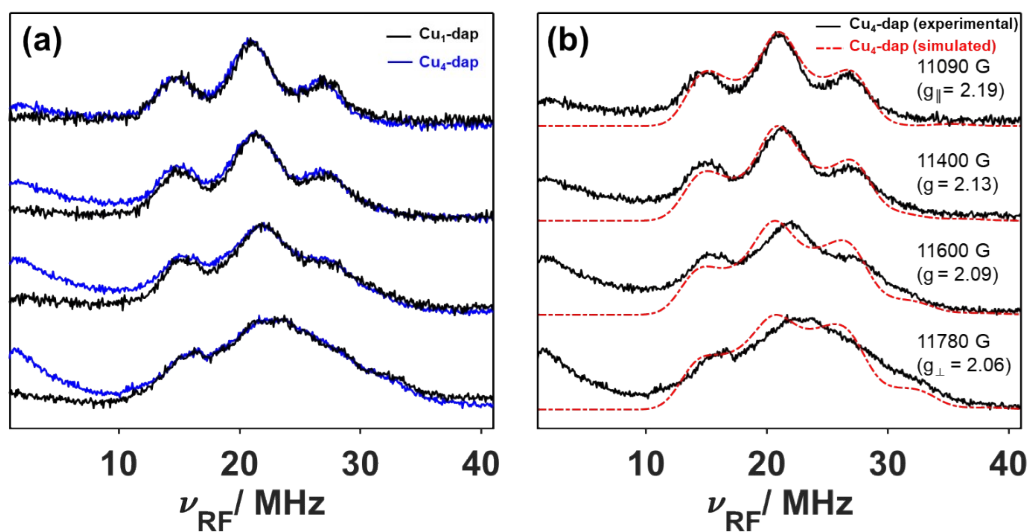

**Figure S13.** 33.9 GHz- $^{14}\text{N}$  Davies ENDOR of (a)  $\text{Cu}_n\text{-dap}$  ( $n = 1$  and  $n = 4$ ), and (b)  $\text{Cu}_4\text{-dap}$  and the simulated spectra of  $\text{Cu}_4\text{-dap}$  (red dashed lines). Experimental parameters: Microwave frequency, 33.9 GHz; pulse sequence, 64-32-64 ns; inter-pulse time ( $\tau$ ), 200 ns; temperature, 15 K. Simulation parameters for (b):  $g = [2.198, 2.042, 2.042]$ ,  $A(^{14}\text{N}) = [17.0, 14.5, 14.5]$  G.

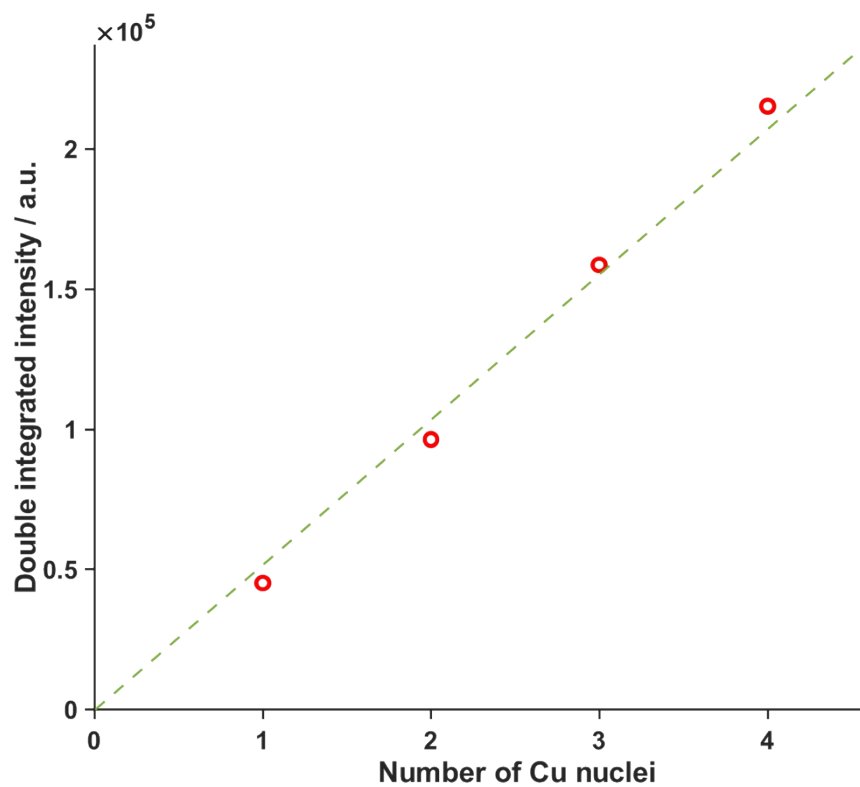

**Figure S14.** Double integrated intensity calculated from CW-EPR spectra (Figure 2c) plotted with the increasing number of copper ions in  $\text{Cu}_n\text{-dap}$  ( $n = 1\text{--}4$ ).

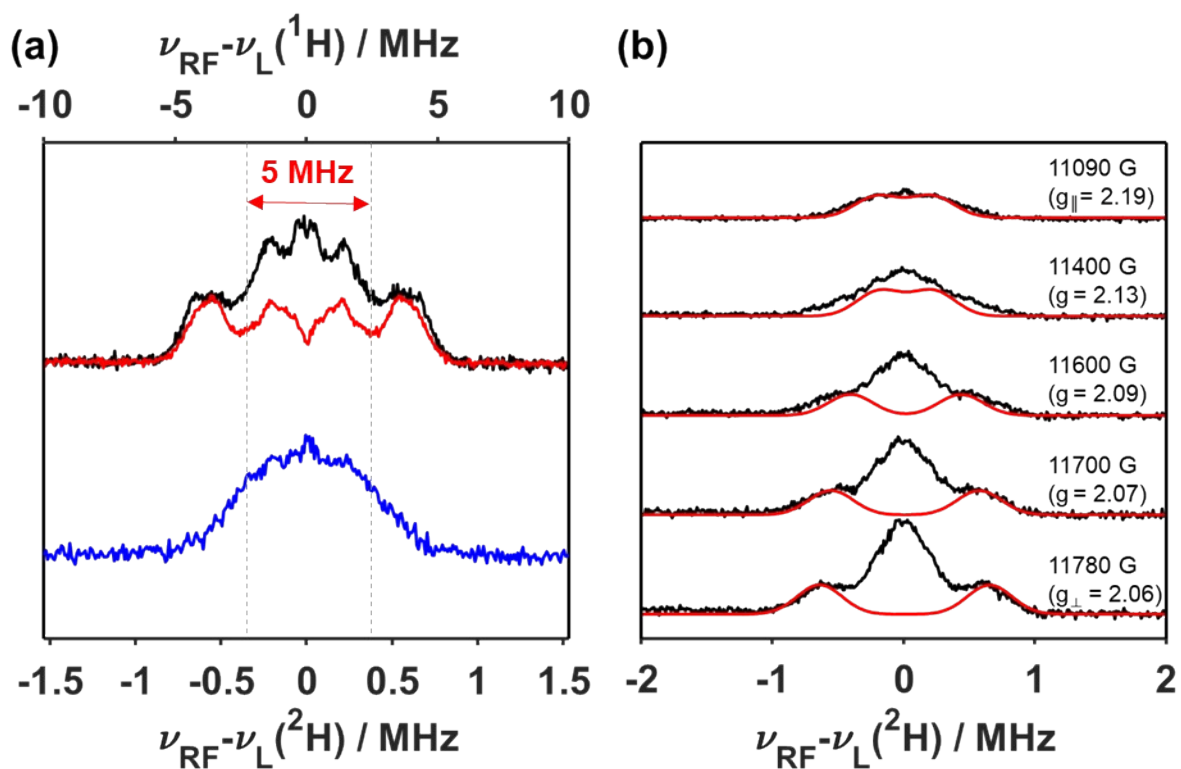

**Figure S15.** 33.9 GHz  $^1\text{H}$  ENDOR spectra of  $\text{Cu}_4\text{-dap}$ . (a)  $^1\text{H}$  Davies ENDOR of  $\text{Cu}_4\text{-dap}$  in  $\text{H}_2\text{O}$  (black line), in  $\text{D}_2\text{O}$  (red line), and  $^2\text{H}$  Mims ENDOR in  $\text{D}_2\text{O}$  (blue line) at  $g_{\parallel}$ . (b) Field dependent  $^2\text{H}$  Mims ENDOR spectra of  $\text{Cu}_4\text{-dap}$  (black lines) and the simulated spectra (red lines). Experimental parameters for  $^1\text{H}$  Davies ENDOR (a): microwave frequency, 33.9 GHz; pulse sequence, 64-32-64 ns; inter-pulse time ( $\tau$ ), 200 ns; and temperature, 15 K. Experimental parameters for  $^2\text{H}$  Mims ENDOR (a): microwave frequency, 33.9 GHz; pulse sequence, 32-32-32 ns; inter-pulse time ( $\tau$ ), 200 ns; and temperature, 15 K. Simulation parameters for (b):  $g = [2.198, 2.042, 2.042]$ ,  $A(^2\text{H}) = [-0.6, 1.5, 1.5]$  G.

## 9. Evans method

The Evans method measures the magnetic susceptibility ( $\chi_M$ ) using an NMR spectrometer (JEOL ECS400, JEOL Ltd., Tokyo, JP). We employ a procedure for Evans method, which is reported by Powers, T. M. with following modifications.<sup>2</sup> Cu<sub>n</sub>-dap and daptomycin samples (6.67 mM) were prepared by dissolving lyophilized samples in Na<sub>2</sub>HPO<sub>4</sub> buffer (0.1 M in D<sub>2</sub>O/H<sub>2</sub>O (50:1, v/v)) (50:1, v/v). The resulting pH\* values were ranging from 11.81 to 11.88. Using centrifugation at 10,000 rpm over 5 min, any unbound Cu(II) was removed. Each sample (600  $\mu$ L) was transferred into NMR tube with capillary inset containing Na<sub>2</sub>HPO<sub>4</sub> solution (0.1 M in D<sub>2</sub>O/H<sub>2</sub>O (50:1, v/v)), and <sup>1</sup>H NMR was recorded at 25 °C. The parameters on Table S2 were calculated from the obtained NMR spectra and Eq. S6–8.

**Table S2.** Evans method parameters for the number of unpaired electrons.

|                      | $\delta_1$<br>(ppm) | $\delta_2$ (ppm) | $\Delta f$ (Hz) | [Cu]<br>(mM) | $\chi_M$<br>( $\times 10^{-3}$<br>cm <sup>3</sup> /mol) | $\mu_s$ | $n_e$ |
|----------------------|---------------------|------------------|-----------------|--------------|---------------------------------------------------------|---------|-------|
| Linear dap           | 4.667               | 4.667            | 0               | -            | -                                                       | -       | -     |
| Cu <sub>1</sub> -dap | 4.669               | 4.633            | 14.400          | 6.667        | 1.290                                                   | 1.754   | 1.019 |
| Cu <sub>2</sub> -dap | 4.669               | 4.609            | 24.000          | 13.334       | 1.075                                                   | 1.601   | 0.888 |
| Cu <sub>3</sub> -dap | 4.669               | 4.577            | 36.800          | 20.001       | 1.099                                                   | 1.619   | 0.903 |
| Cu <sub>4</sub> -dap | 4.669               | 4.527            | 56.800          | 26.668       | 1.272                                                   | 1.742   | 1.008 |

$\mu_s$ : magnetic moment,  $\chi_M$ : molar magnetic susceptibility, T: temperature (K),  $\delta_1$ : pure solvent resonance,  $\delta_2$ : shifted resonance with paramagnetic species, F: spectrometer radio frequency in Hz (400 MHz), c: concentration of Cu(II) in solution (mol/mL),  $n_e$ : the number of unpaired electrons.

$$\Delta f = (\delta_1 - \delta_2) \times 400 \text{ MHz} \quad (\text{Eq. S6})$$

$$\chi_M = \frac{3\Delta f}{4\pi Fc} \quad (\text{Eq. S7})$$

$$\mu_s = \sqrt{8(\chi_M T)} \approx \sqrt{n_e(n_e + 2)} \quad (\text{Eq. S8})$$



## 10. Synthesis of the tetra-methyl ester derivative of daptomycin

The tetra-methyl ester derivative of daptomycin (tetra-methyl derivative) was synthesized according to the previously reported method by Miller and coworkers (Figure S16).<sup>4</sup> Each crude peptide was purified by preparative HPLC and analyzed by analytical HPLC (Figure S17) and LC-MS.

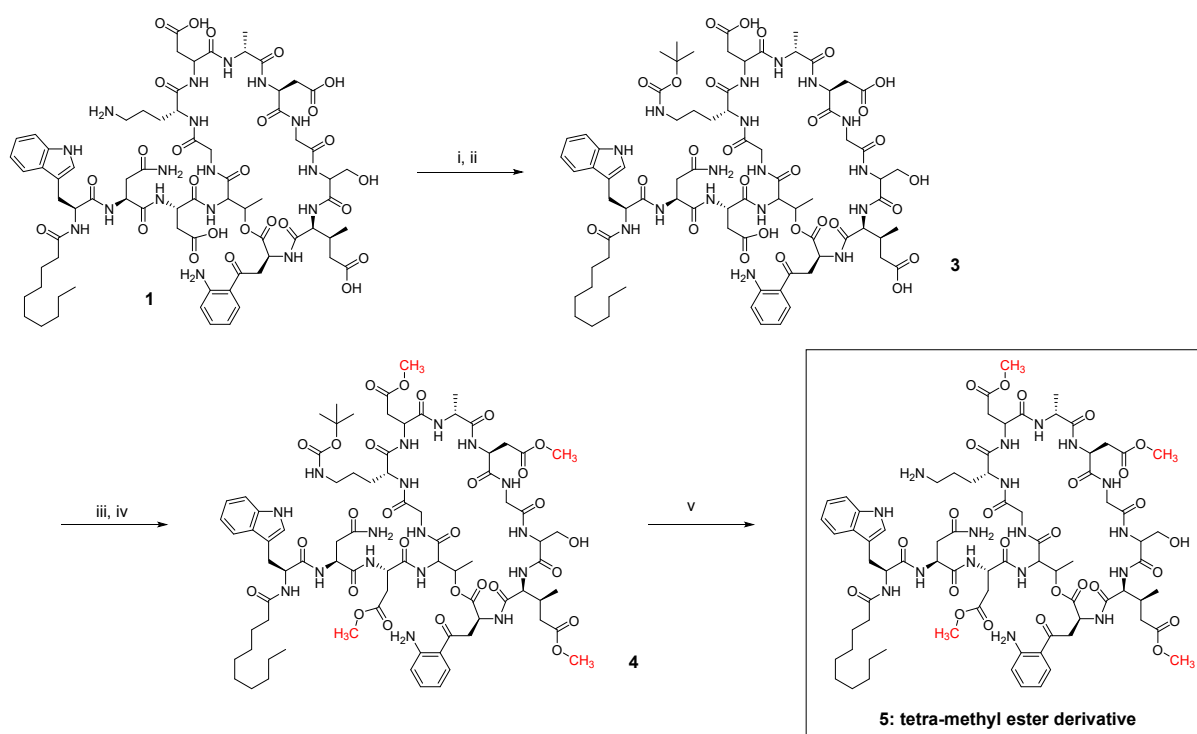

**Figure S16.** Synthetic procedure for preparing the tetra-methyl ester derivative of daptomycin.

(i)  $\text{Boc}_2\text{O}$ , pH 9–10, NaOH (aq), 0 °C to room temperature, 24 h; (ii) pH ~3, HCl (aq), 0 °C; (iii) pivalic anhydride, *i*-Pr<sub>2</sub>NEt, 0 °C, 30 min; (iv) DMAP, MeOH, 0 °C, 30 min, ramp to room temperature, 6 h; (v) 50% TFA/CH<sub>2</sub>Cl<sub>2</sub> (v/v), room temperature, 2.5 h.

### 10.1. Synthesis of Boc-protected daptomycin (**3**)

The pH of a stirring mixture of daptomycin (50 mg, 0.030 mmol, 1 equiv) in H<sub>2</sub>O (1 mL) was adjusted to 10 by adding several drops of cold NaOH (1.0 M, aq) in an ice bath. Then, Boc<sub>2</sub>O (17 mg, 0.077 mmol, 2.5 equiv) was added to the solution. The pH of the reaction mixture was readjusted to pH ~9 by addition of NaOH (1.0 M, aq). The reaction conversion was monitored using LC-MS, and the pH was kept to 9.0 at room temperature. After 24 h, the reaction mixture was acidified with cold HCl (1.0 M, aq) to pH ~3 in an ice bath, and the solvent was evaporated to afford a yellow solid. The crude product was dissolved in CH<sub>3</sub>CN (1.0 mL) and purified using preparative HPLC with HPLC gradient **method 1** (see page S4). After purification, Boc-protected daptomycin (**3**) was obtained as a white powder (36 mg, 70% yield) *m/z* (LC-MS) calcd for C<sub>77</sub>H<sub>109</sub>N<sub>17</sub>O<sub>28</sub> 1719.76, found 1720.7 [M+H]<sup>+</sup>.

### 10.2. Synthesis of the Boc-protected tetra-methyl ester derivative of daptomycin (**4**)

Pivalic anhydride (14 μL, 13 mg, 69 μmol, 7.9 equiv) was added to a stirring solution of **3** (14.9 mg, 8.7 μmol, 1.0 equiv) and *i*-Pr<sub>2</sub>EtN (9.3 μL, 6.9 mg, 53 μmol, 6.1 equiv) in DMF (1.0 mL) at 0 °C and was stirred for 30 min. Then, DMAP (2.1 mg, 17 μmol, 2.0 equiv) and MeOH (0.10 mL, anhydrous) were added to the reaction mixture and stirred at 0 °C for 30 min. Then, the temperature was ramped to room temperature and stirred for 6 h. Using LC-MS, the conversion of the reaction was confirmed. The crude product was dissolved in 50% CH<sub>3</sub>CN/H<sub>2</sub>O (3.0 mL, v/v) and purified using preparative HPLC with HPLC gradient **method 2** (see page S4). After purification, the Boc-protected tetra-methyl ester derivative of daptomycin was obtained as a white powder (5.7 mg, 38% yield). *m/z* (LC-MS) calcd for C<sub>81</sub>H<sub>117</sub>N<sub>17</sub>O<sub>28</sub> 1775.83, found 1777.7 [M+H]<sup>+</sup>.

### 10.3. Synthesis of the tetra-methyl ester derivative of daptomycin (5)

Protected peptide **4** (5.7 mg, 3.2  $\mu\text{mol}$ ) was dissolved in 50% TFA (1.0 mL) in anhydrous  $\text{CH}_2\text{Cl}_2$ , and the reaction mixture was stirred for 2.5 h. Under blowing  $\text{N}_2$ , the solvent was evaporated, and  $\text{CH}_2\text{Cl}_2$  (~1 mL) was added to dissolve the product. The solvent was evaporated again to remove residual TFA. The crude peptide was dissolved in 50%  $\text{CH}_3\text{CN}/\text{H}_2\text{O}$  (2.0 mL, v/v) and purified using preparative HPLC with HPLC gradient **method 2** (see page S4). The tetra-methyl ester derivative of daptomycin **5** (TFA salt) was obtained as a white powder (2.9 mg, 1.6  $\mu\text{mol}$  (a TFA salt), 50% yield).  $m/z$  (LC-MS) calcd for  $\text{C}_{77}\text{H}_{111}\text{N}_{17}\text{O}_{26}$  1675.77, found 1676.8.

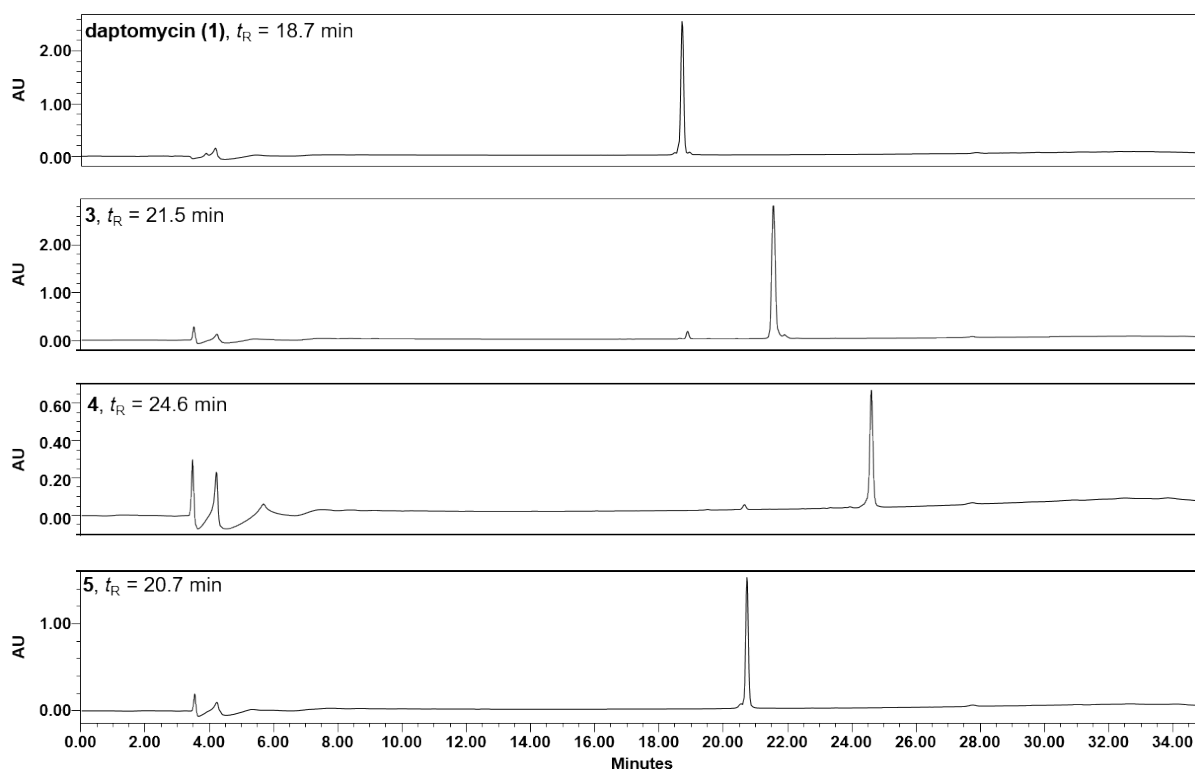

**Figure S17.** Analytical HPLC traces of the peptides purified with HPLC gradient **method 1** (see page S4).

## 11. Comparison between daptomycin and the tetra-methyl ester derivative **5** in metallation

For the kinetic study of Cu complexation with the peptides (daptomycin or tetra-methyl derivative **5**), to a solution of the peptide (1 mM, 1 mL) in Na<sub>2</sub>HPO<sub>4</sub> buffer (0.1 M, pH 11.5, *I*=0.44 M) at 25 °C, 4 equiv of CuCl<sub>2</sub> (0.1 M (aq)) was added. The UV-vis spectra were recorded at the time points indicated (Figure S18).

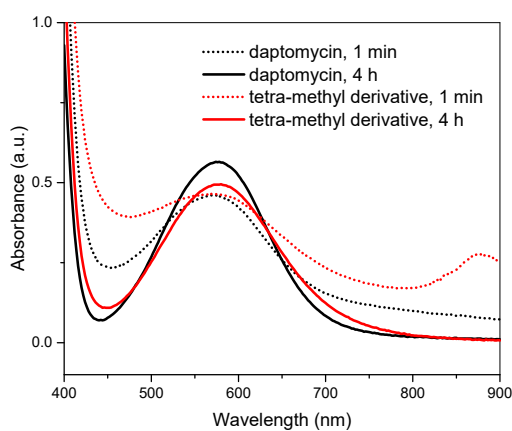

**Figure S18.** Kinetic study of metallation using daptomycin (**1**) or the tetra-methyl ester derivative of daptomycin (**5**). UV-vis spectra obtained at 1 min or 4 h after the addition of CuCl<sub>2</sub>.

## 12. Cu(0/I/II) redox state assignment of Cu<sub>n</sub>-dap complexes

To deconvolute the redox couples from the multiple redox signals, additional CVs were analyzed. A CV with a narrow potential window of 0.4–1.2 V<sub>RHE</sub> showed a single redox reaction at *ca.* 0.8 V<sub>RHE</sub> with a peak separation of 100 mV (Figure S19a). Since the initial Cu oxidation state in the complex was +2, this redox peak can be attributed to either that of Cu(I/II) or Cu(II/III). However, since the reported redox potential for Cu(II/III) is in 1.2–1.4 V<sub>RHE</sub>, much higher than that of the Cu<sub>4</sub>-dap complex, the observed redox couple is predicted to be Cu(I/II). It is consistent with the reported values for Cu(I/II) redox potential in 0.5–0.8 V<sub>RHE</sub> (Table S3). Afterward, the CV study was carried out in 0.05–1.2 V<sub>RHE</sub>, showing oxidation and reduction peaks at *ca.* 0.6 and 0.2 V<sub>RHE</sub>, respectively. The new reduction peak at *ca.* 0.2 V<sub>RHE</sub> is likely attributed to the Cu(II) and/or Cu(I) to Cu(0) reactions, which is consistent with reported values (Table S3). During these processes, the formed Cu(0) is supposed to be adsorbed on the GC substrate as discussed in other literatures, eventually inducing a heterogeneous process.<sup>5-7</sup> We assume that this redox process likely involves demetallation of Cu(0 or I) and geometrical rearrangement of the Cu-complexes; therefore, the oxidation peak at 0.60 V<sub>RHE</sub> possibly indicates the Cu(0) to Cu(I) and/or Cu(II) reactions accompanying re-complexation of Cu(II)/Cu(I) species with the peptide backbones. This heterogeneous process can account for the highly irreversible feature of the Cu(II/0 or I/0) redox reaction.

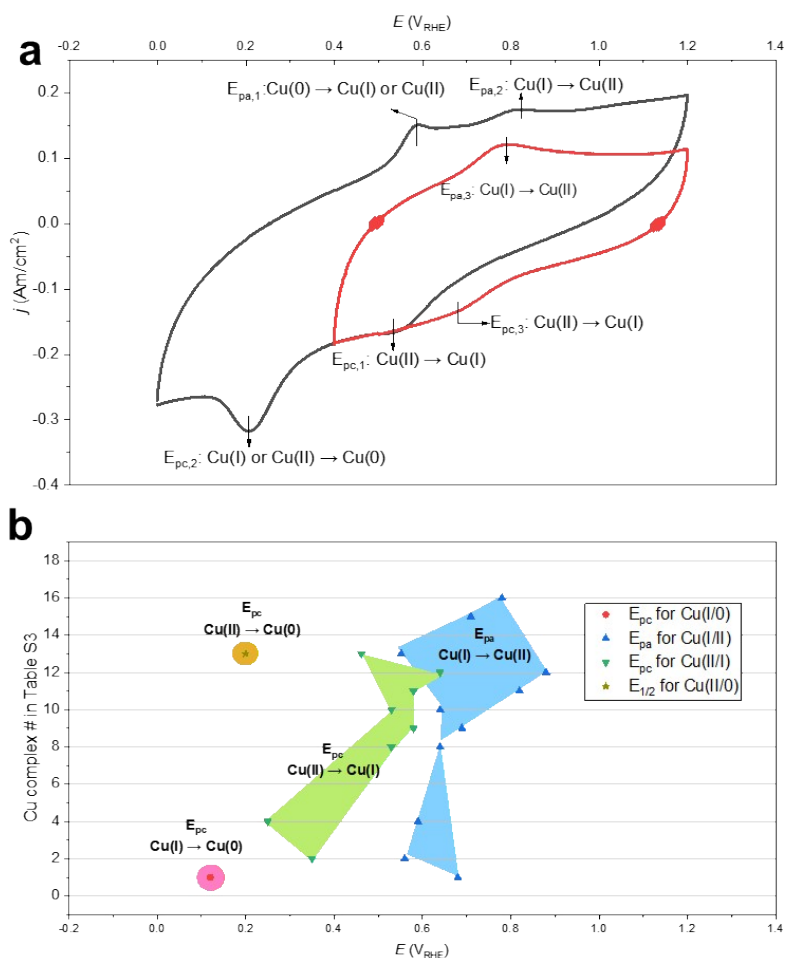

**Figure S19.** (a) CV results measured with  $\text{Cu}_4\text{-dap}$  complex (1 mM) with different potential windows in a sodium phosphate buffer (0.1 M, pH 11.5,  $I = 0.44$  M) at 25 °C. The electrochemical analyses were conducted with a potentiostat (VMP3, Bio-Logic Science Instruments, FR) and a rotating disk electrode instrument (RRDE-3A, ALS) in a two-compartment cell equipped with a graphite rod and an Ag/AgCl reference electrode (RE-16 for strong alkaline media, polyether ether ketone body (PEEK), EC-Frontier) as the counter and reference electrodes, respectively. A 5 mm-diameter glassy carbon (GC) rotating disk electrode was used as the working electrode after it was mirror polished with an alumina slurry (0.5  $\mu\text{m}$ , R&B Inc., KR). (b) The reported potentials of Cu redox with various Cu molecular complexes (see Table S3 for the details in reported potentials).

**Table S3.** The previously reported redox potentials in CV analysis for Cu(II) complexes.

| Cu complex                                                                          | Cu sites                         | Nuclearity | Redox ( $E$ ( $V_{\text{RHE}}$ )) |          |                                                                                          |                                                                                          |            | Ref |
|-------------------------------------------------------------------------------------|----------------------------------|------------|-----------------------------------|----------|------------------------------------------------------------------------------------------|------------------------------------------------------------------------------------------|------------|-----|
|                                                                                     |                                  |            | Cu(I/0)                           | Cu(II/0) | Cu(II/I)                                                                                 | Cu(I/II)                                                                                 | Cu(II/III) |     |
| 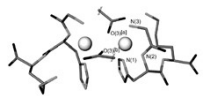   | Cu-N <sub>3</sub> O              | 1          | 0.12                              | nd       | nd                                                                                       | 0.68                                                                                     | nd         | 6   |
|    | Cu-N <sub>2</sub> O <sub>3</sub> | 4          | nd                                | nd       | 0.35<br>(Cu <sup>II</sup> <sub>4</sub> → Cu <sup>II</sup> <sub>3</sub> Cu <sup>I</sup> ) | 0.56<br>(Cu <sup>II</sup> <sub>3</sub> Cu <sup>I</sup> → Cu <sup>II</sup> <sub>4</sub> ) | nd         | 8   |
|    | Cu-N <sub>4</sub> O <sub>1</sub> | 1          | nd                                | nd       | $E_{1/2} = 0.47 V_{\text{RHE}}$                                                          |                                                                                          | nd         | 9   |
|    | Cu-N <sub>4</sub> O              | 2          | nd                                | nd       | 0.25<br>(Cu <sup>II</sup> <sub>2</sub> → Cu <sup>II</sup> Cu <sup>I</sup> )              | 0.59<br>(Cu <sup>II</sup> Cu <sup>I</sup> → Cu <sup>II</sup> <sub>2</sub> )              | nd         | 10  |
|    | Cu-N <sub>3</sub> O <sub>3</sub> | 2          | nd                                | nd       | $E_{1/2} = 0.6 V_{\text{RHE}}$                                                           |                                                                                          | nd         | 11  |
|   | Cu-N <sub>4</sub> O <sub>2</sub> | 1          | nd                                | nd       | nd                                                                                       | nd                                                                                       | 1.23       | 12  |
|  | Cu-N <sub>2</sub> O <sub>2</sub> | 1 or 2     | nd                                | nd       | $E_{1/2} = 0.64 V_{\text{RHE}}$                                                          |                                                                                          | nd         | 13  |

|    |                                                                                     |                                                               |    |    |      |                                          |                   |      |        |
|----|-------------------------------------------------------------------------------------|---------------------------------------------------------------|----|----|------|------------------------------------------|-------------------|------|--------|
| 8  | 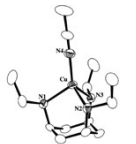   | Cu-N <sub>4</sub>                                             | 1  | nd | nd   | 0.53 <sup>a</sup>                        | 0.64 <sup>a</sup> | nd   | 14     |
| 9  |    | Cu-N <sub>4</sub>                                             | 1  | nd | nd   | 0.58 <sup>a</sup>                        | 0.69 <sup>a</sup> | nd   | 14     |
| 10 |    | Cu-N <sub>4</sub>                                             | 1  | nd | nd   | 0.53 <sup>a</sup>                        | 0.64 <sup>a</sup> | nd   | 14     |
| 11 |    | Cu-A $\beta$<br>Cu-N <sub>3</sub> O <sub>2</sub> <sup>b</sup> | 1  | nd | nd   | 0.58                                     | 0.82              | nd   | 15, 16 |
| 12 |    | nd                                                            | nd | nd | nd   | 0.64                                     | 0.88              | nd   | 17     |
| 13 |   | Cu-N <sub>4</sub>                                             | 1  | nd | 0.20 | 0.46                                     | 0.55              | 1.44 | 5, 18  |
| 14 |  | Cu-N <sub>6</sub>                                             | 1  | nd | nd   | E <sub>1/2</sub> = 0.56 V <sub>RHE</sub> |                   | nd   | 19     |



|    |                                                                                   |                                  |   |    |    |      |      |      |    |
|----|-----------------------------------------------------------------------------------|----------------------------------|---|----|----|------|------|------|----|
| 15 | 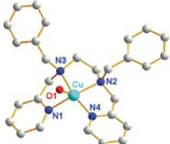 | Cu-N <sub>4</sub> O              | 1 | nd | nd | nd   | 0.71 | nd   | 19 |
| 17 |  | Cu-N <sub>2</sub> O <sub>2</sub> | 1 | nd | nd | 0.48 | 0.78 | 0.98 | 20 |

<sup>a</sup> The potentials were measured in 9:1 (v/v) CH<sub>2</sub>Cl<sub>2</sub>/MeCN vs. SCE. <sup>b</sup> adapted from as the Davies ENDOR EPR-based structure determination.<sup>16</sup> ‘nd’ indicates the values were not determined.

### 13. Ascorbic acid oxidation

Ascorbic acid (Asc) oxidation with  $\text{Cu}_n\text{-dap}$  ( $n = 0\text{--}4$ ) was evaluated in  $\text{Na}_2\text{HPO}_4$  buffer (0.1 M, pH 11.5,  $I = 0.44$  M) by measuring the absorbance at 265 nm versus time at 25 °C.<sup>21, 22</sup> The absorbance was measured using a TECAN microplate plate reader with a kinetic measurement mode which records the absorbance at 265 nm for 2 min. The final solution containing the Cu-peptide complex (1  $\mu\text{M}$ , 200  $\mu\text{L}$ ) in the buffer with Asc (0.25 mM) was transferred to a quartz microplate (Hellma Analytics, Müllheim, GE). Based on the obtained absorbance of Asc solution versus concentration plot (3.53 abs/mM, Figure S20), the concentration during oxidation was calculated. By obtaining consumed Asc concentration for 2 min, the reaction rate was calculated. Since autoxidation of Asc in buffer solution was observed ( $v_{o, \text{Asc ox}} = 0.43 \pm 0.0008$  mM/min), the background reaction rate was subtracted from the obtained initial rates to provide corrected reaction rates (Table S4).

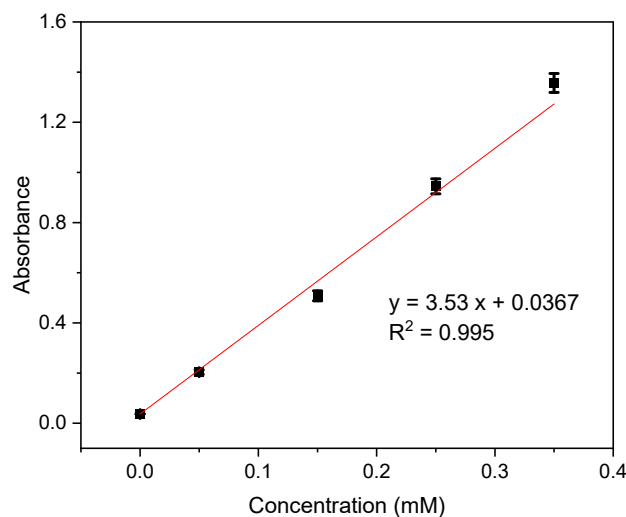

**Figure S20.** Absorbance at 265 nm was plotted along with Asc concentration in  $\text{Na}_2\text{HPO}_4$  buffer (0.1 M, pH 11.5) at 25 °C. After triplicated experiments, the standard deviations were calculated and used for error bars.

**Table S4.** Results of Asc oxidation with Cu<sub>n</sub>-dap and Cu-G<sub>4</sub>.

|                                | Corrected reaction rate (mM/min) |
|--------------------------------|----------------------------------|
| Blank                          | 0                                |
| Linear dap                     | -0.0013 ± 0.0033                 |
| Cu <sub>1</sub> -dap           | 0.0004 ± 0.0025                  |
| Cu <sub>2</sub> -dap           | 0.0048 ± 0.0025                  |
| Cu <sub>3</sub> -dap           | 0.0178 ± 0.0046                  |
| Cu <sub>4</sub> -dap           | 0.0262 ± 0.0039                  |
| Cu <sub>8</sub> -dap           | 0.0290 ± 0.0038                  |
| Cu-G <sub>4</sub> <sup>a</sup> | 0.0029 ± 0.0031                  |

<sup>a</sup> Cu-G<sub>4</sub> (4 μM) was used to maintain the same concentration of [Cu(II)] with Cu<sub>4</sub>-dap (1 μM) in Na<sub>2</sub>HPO<sub>4</sub> buffer (0.1 M, pH 11.5). After triplicated experiments, the averages and standard deviations were calculated.

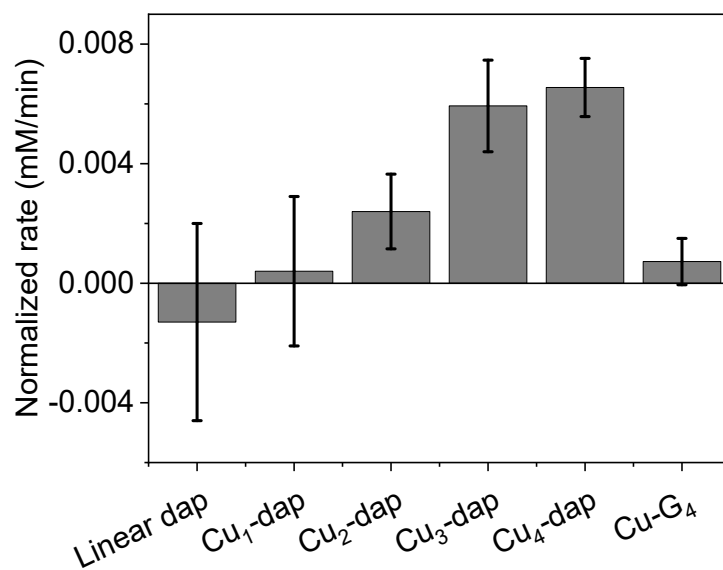

**Figure S21.** Normalized rate per the number of the bound Cu (II) for Asc oxidation mediated by Cu<sub>n</sub>-peptide complexes. After triplicate experiments, the averages and standard deviations were calculated for each data point and error bar.

## 14. 2,6-Dimethoxyphenol oxidation

The catalytic activity of  $\text{Cu}_n\text{-dap}$  for 2,6-dimethoxyphenol (DMP) oxidation was evaluated in a  $\text{Na}_2\text{HPO}_4$  buffer (0.1 M, pH 11.5,  $I = 0.44$  M) at 25 °C. The method previously reported by Makhlynets *et al.* was used with slightly modified conditions.<sup>23</sup> The absorbance was measured using a TECAN microplate plate reader with a kinetic measurement mode by recording the absorbance at 476 nm for 1 h. DMP stock solution (4 mM) was prepared by diluting 1.0 M DMP in isopropyl alcohol with  $\text{Na}_2\text{HPO}_4$  buffer (0.1 M, pH 11.5). The final solution containing the Cu-peptide (5  $\mu\text{M}$ , 200  $\mu\text{L}$ ) and DMP (1 mM) was transferred to a 96-well natural PP plate (Greiner BiO-One, Kremsmünster, AT). The obtained absorbance was changed to concentration by using the previously reported molecular extinction coefficient of 3,3',5,5'-tetramethoxybiphenol (14,800  $\text{cm}^{-1}\cdot\text{M}^{-1}$ ).<sup>5</sup> The initial rate was acquired from the difference of initial absorbance and that after 3 min based on the Beer-Lambert law. The initial reaction rate of the background reaction ( $v_{0, \text{DMP ox}} = 0.0508 \pm 0.0020$   $\mu\text{M}/\text{min}$ ) was subtracted from the obtained initial rates of the reactions that occurred with the Cu-peptide complexes to provide corrected reaction rates (Figures S22 and S23, Table S5).

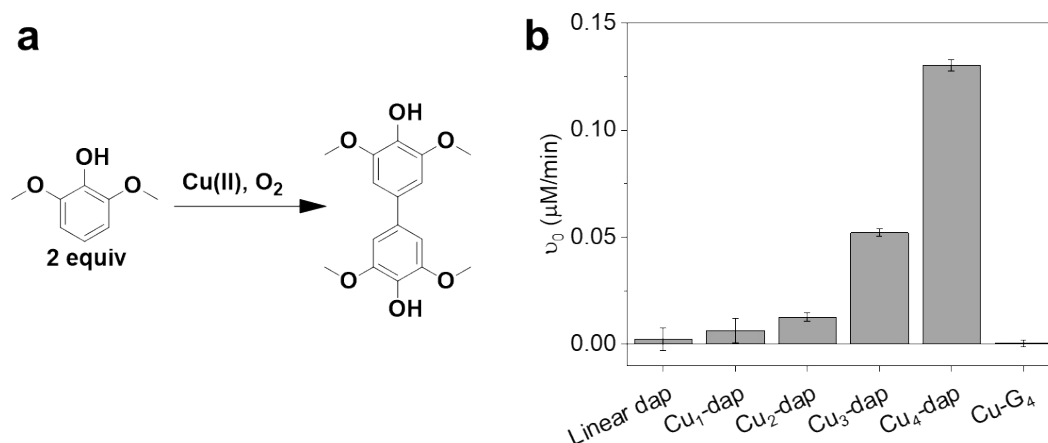

**Figure S22.** (a) DMP oxidation reaction. (b) Reaction rate of DMP oxidation with  $\text{Cu}_n\text{-dap}$  (5  $\mu\text{M}$ ) and Cu-G<sub>4</sub> (20  $\mu\text{M}$ ). After triplicated experiments, the averages and standard deviations were calculated.

**Table S5.** Results of DMP oxidation with Cu<sub>n</sub>-dap and Cu-G<sub>4</sub>.

|                                | Corrected reaction rate (μM/min) |
|--------------------------------|----------------------------------|
| Blank                          | 0                                |
| Linear dap                     | 0.0023 ± 0.0052                  |
| Cu <sub>1</sub> -dap           | 0.0063 ± 0.0056                  |
| Cu <sub>2</sub> -dap           | 0.0126 ± 0.0020                  |
| Cu <sub>3</sub> -dap           | 0.0521 ± 0.0017                  |
| Cu <sub>4</sub> -dap           | 0.1304 ± 0.0026                  |
| Cu-G <sub>4</sub> <sup>a</sup> | 0.0004 ± 0.0015                  |

<sup>a</sup>Cu-G<sub>4</sub> (20 μM) was used to maintain the same concentration of [Cu(II)] with Cu<sub>4</sub>-dap (5 μM) in Na<sub>2</sub>HPO<sub>4</sub> buffer (0.1 M, pH 11.5). After triplicate experiments, the averages and standard deviations were calculated.

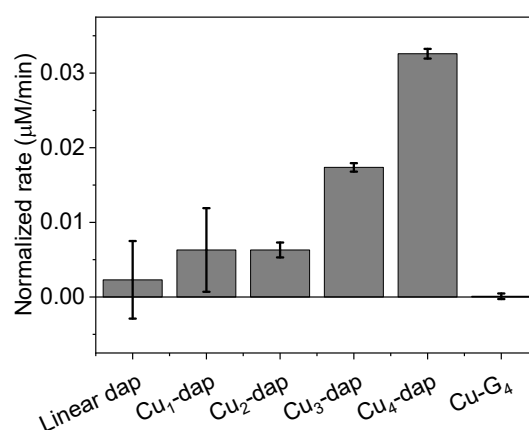

**Figure S23.** Normalized rate per the number of the bound Cu (II) for DMP oxidation mediated by Cu<sub>n</sub>-peptide complexes. After triplicate experiments, the averages and standard deviations were calculated for each data point and error bar.

### 15. O<sub>2</sub> evolution measurement during H<sub>2</sub>O<sub>2</sub> disproportionation with Cu<sub>n</sub>-dap.

O<sub>2</sub> evolution was directly measured at 25 °C using a fiber-optic O<sub>2</sub> sensor (FireStingO<sub>2</sub>, PyroScience, Aachen, GE) equipped with robust oxygen probe in a setup displayed on Figure S24. Using N<sub>2</sub> balloon, the atmosphere in reaction vessel containing Cu<sub>n</sub>-dap solution (1 mM, 1 mL) was replaced with N<sub>2</sub>, until the O<sub>2</sub> (%) value was stabilized. Then H<sub>2</sub>O<sub>2</sub> (11.6 mM in Na<sub>2</sub>HPO<sub>4</sub> buffer (0.1 M, pH 11.5, *I* = 0.44 M), 1 mL) was injected, and the O<sub>2</sub> (%) value was recorded. Using calibration curve obtained by direct injection of known O<sub>2</sub> moles in the same setup, the raw values (%) were converted to O<sub>2</sub> (moles) (Figure S25).

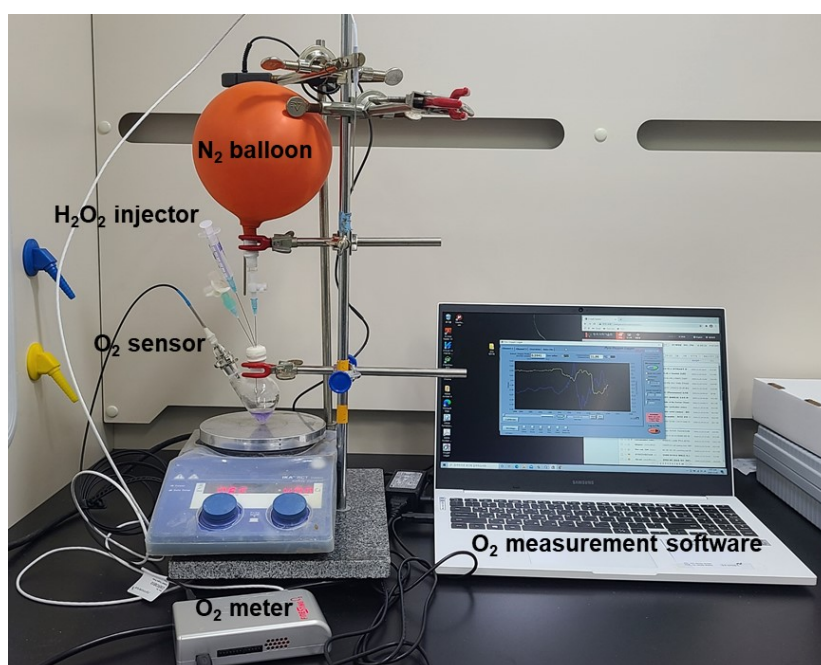

**Figure S24.** Experimental set up O<sub>2</sub> measurement of H<sub>2</sub>O<sub>2</sub> disproportionation.

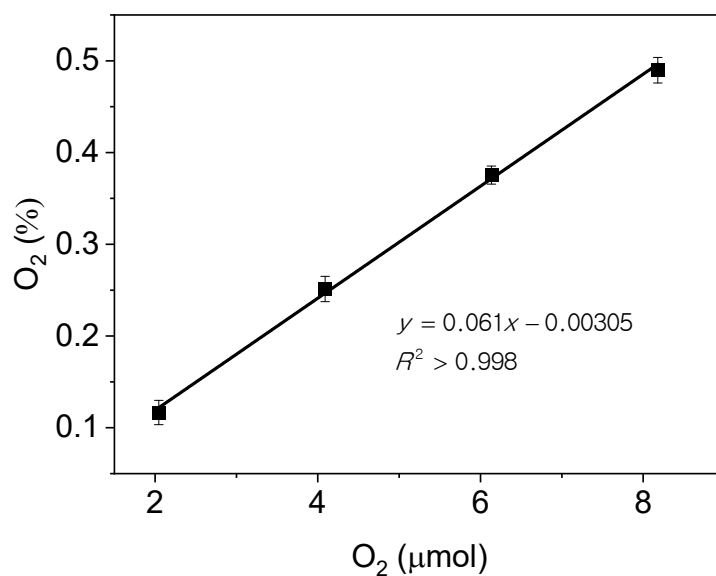

**Figure S25.** O<sub>2</sub> calibration curve to convert the read of the oxygen sensor (%) to the number of moles (μmol) measured in the reaction vessel. After triplicate experiments, the averages and standard deviations were calculated for each data point and error bar.

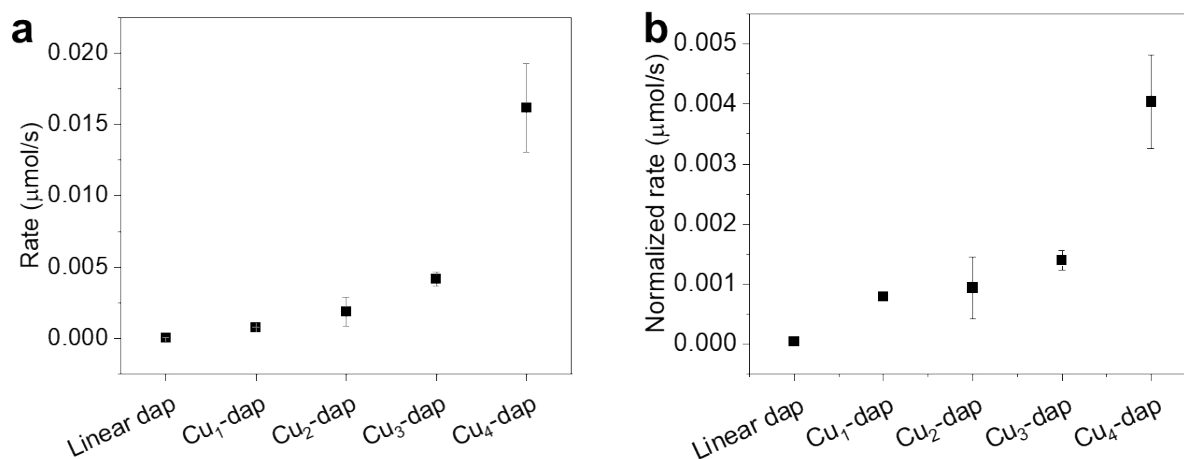

**Figure S26.** (a) Observed and (b) normalized rates per the number of the bound Cu (II) for H<sub>2</sub>O<sub>2</sub> disproportionation mediated by Cu<sub>n</sub>-dap complexes. After triplicate experiments, the averages and standard deviations were calculated for each data point and error bar.



## 16. Hydroxyl radical detection using 2,7-dichlorofluorescein diacetate

The hydroxyl radical was detected using 2,7-dichlorofluorescein diacetate (DCFH-DA) in  $\text{Na}_2\text{HPO}_4$  buffer (0.1 M, pH 11.5,  $I = 0.44$  M) at 25 °C with the Cu complexes (Figures S27).<sup>24</sup>  
<sup>25</sup> The emission at 535 nm with an excitation at 485 nm was measured using a Synergy H1 microplate plate reader with a kinetic measurement mode, which measures emission every 40 s. The final solution contained the Cu-peptide complex (1  $\mu\text{M}$ , 200  $\mu\text{L}$ ) and DCFH-DA (10  $\mu\text{M}$ ) under four conditions; (1) no additives, (2) Asc (1 mM), (3) Asc (1 mM) and  $\text{H}_2\text{O}_2$  (1 mM), and (4)  $\text{H}_2\text{O}_2$  (1 mM). A PP black 96-well microplate (Greiner BiO-One, Kremsmünster, AT) was used. The intensity of the emission at 535 nm was measured three times for each condition (Figures S28 and S29, Table S6).

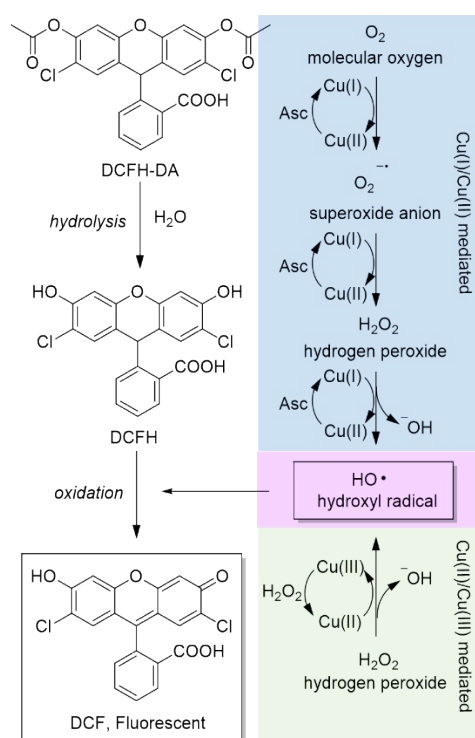

**Figure S27.** Conversion of DCFH-DA to DCF by hydroxyl radicals and two possible pathways for hydroxyl radical generation by copper catalysts.

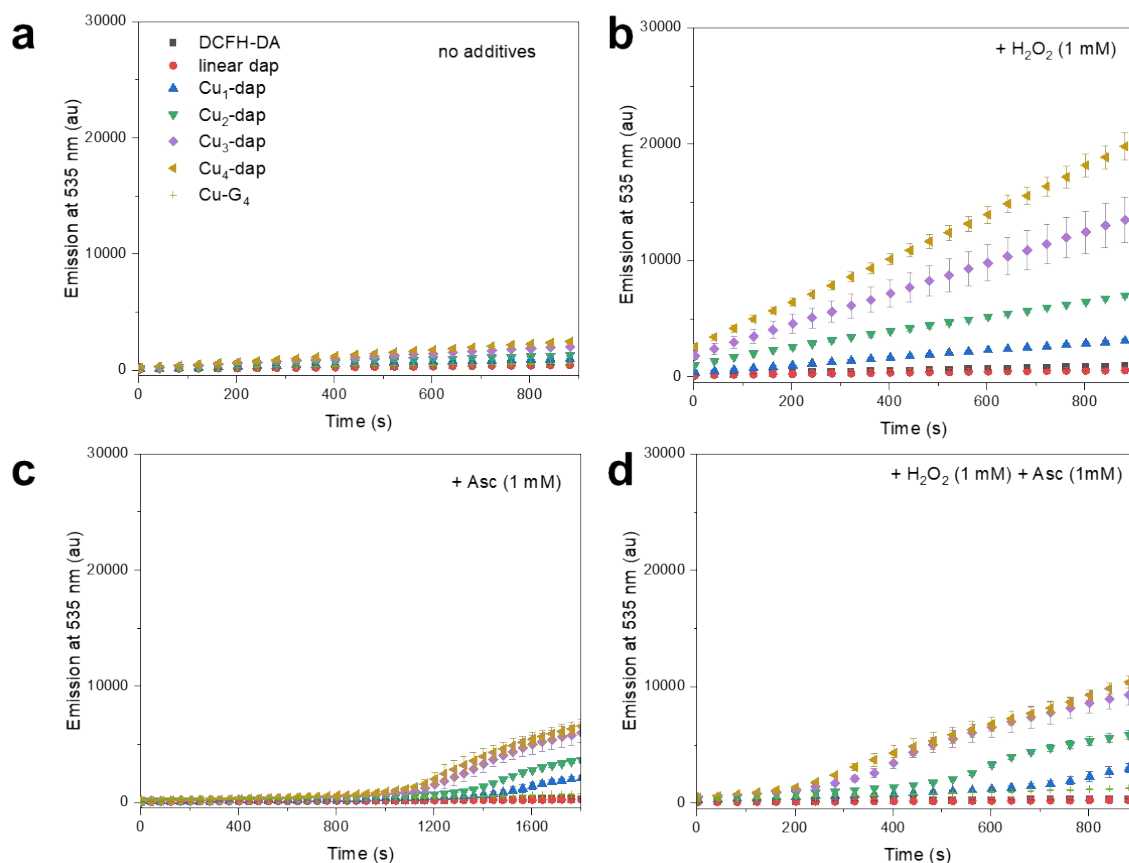

**Figure S28.** Emission at 535 nm versus time with/without Cu complexes (1  $\mu$ M): (a) with no additive, (b) with H<sub>2</sub>O<sub>2</sub> (1 mM), (c) with Asc (1 mM), and (d) with Asc (1 mM) and H<sub>2</sub>O<sub>2</sub> (1 mM). As shown in (c), there were two distinguishable emission increments of DCF in the presence of Asc. Slow  $\cdot$ OH generation at the earlier stage and subsequent rapid emission increase were observed. The two different stages suggest that Cu<sub>4</sub>-dap generates  $\cdot$ OH through O–O bond cleavage of the accumulated H<sub>2</sub>O<sub>2</sub> from the two-electron reduction of O<sub>2</sub> (see Figure S26). After triplicate experiments, the averages and standard deviations were calculated for each data point and error bar.

**Table S6.** Reaction rate of DCFH-DA oxidation with Cu<sub>n</sub>-dap.

|                                | Reaction rate (au/s) |                                |               |                                     |
|--------------------------------|----------------------|--------------------------------|---------------|-------------------------------------|
|                                | No additive          | +H <sub>2</sub> O <sub>2</sub> | +Asc          | +H <sub>2</sub> O <sub>2</sub> +Asc |
| Only DCFH-DA                   | 0.447 ± 0.017        | 0.670 ± 0.018                  | 0.142 ± 0.023 | 0.316 ± 0.010                       |
| Linear dap                     | 0.331 ± 0.026        | 0.594 ± 0.042                  | 0.138 ± 0.028 | 0.192 ± 0.020                       |
| Cu <sub>1</sub> -dap           | 0.953 ± 0.047        | 3.055 ± 0.038                  | 0.295 ± 0.024 | 1.307 ± 0.047                       |
| Cu <sub>2</sub> -dap           | 1.244 ± 0.031        | 7.828 ± 0.104                  | 0.248 ± 0.028 | 2.000 ± 0.034                       |
| Cu <sub>3</sub> -dap           | 2.003 ± 0.033        | 13.746 ± 0.104                 | 0.276 ± 0.023 | 3.169 ± 0.210                       |
| Cu <sub>4</sub> -dap           | 2.331 ± 0.042        | 19.203 ± 0.245                 | 0.345 ± 0.009 | 4.055 ± 0.221                       |
| Cu-G <sub>4</sub> <sup>a</sup> | 0.605 ± 0.017        | 0.966 ± 0.018                  | 0.305 ± 0.020 | 1.382 ± 0.071                       |

<sup>a</sup>Cu-G<sub>4</sub> (4 μM) was used to maintain the same concentration of [Cu(II)] with Cu<sub>4</sub>-dap (1 μM) in Na<sub>2</sub>HPO<sub>4</sub> buffer (0.1 M, pH 11.5, *I* = 0.44 M). The averages and standard deviations were calculated from the triplicate experiments.

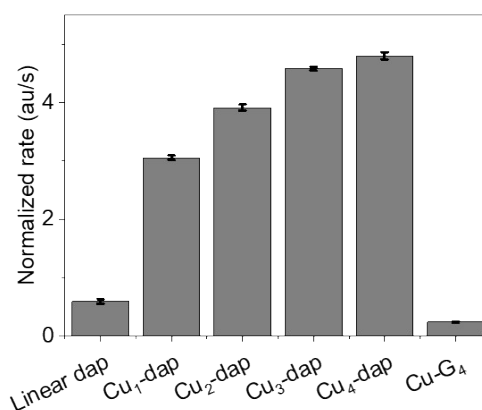

**Figure S29.** Reaction rate normalized by the number of the bound Cu (II) (au/s/the number of Cu) for ·OH generation mediated by Cu<sub>n</sub>-dap complexes in the presence of H<sub>2</sub>O<sub>2</sub>. After triplicate experiments, the averages and standard deviations were calculated for each data point and error bar.

## 17. Electrochemical analysis

The electrochemical analyses were conducted with a potentiostat (VMP3, Bio-Logic Science Instruments, FR) and a rotating disk electrode instrument (RRDE-3A, ALS) in a two-compartment cell equipped with a graphite rod and an Ag/AgCl reference electrode (RE-16 for strong alkaline media, polyether ether ketone body (PEEK), EC-Frontier) as the counter and reference electrodes, respectively. To prevent glassware dissolution and halogen contamination, the cell was made of an acrylic plastic, and the working electrode was separated from the counter and reference electrodes by an ion-conducting membrane.<sup>26, 27</sup> A 5 mm-diameter glassy carbon (GC) rotating disk electrode was used as the working electrode after it was mirror polished with an alumina slurry (0.5  $\mu\text{m}$ , R&B Inc., KR).

In all the measurements, the Ar-saturated  $\text{Na}_2\text{HPO}_4$  buffer (0.1 M, pH 11.5,  $I = 0.44$  M) with and without  $\text{Cu}_n\text{-dap}$  (1 mM,  $n = 0\text{--}4$ ) was prepared with ultrapure water ( $> 18.2$  M $\Omega$ , aqua MAX<sup>TM</sup>-Ultra 370 series, YOUNGLIN). The reference electrode was calibrated against a Pt electrode in the  $\text{H}_2$ -saturated electrolyte, and all the potentials were reported in this study with respect to the reversible hydrogen electrode (RHE). Before the electrochemical analysis, the working electrode was first cleaned by 50 cycles of cyclic voltammetry (CV) in the potential range from 0.05 to 1.2  $V_{\text{RHE}}$  with a 200 mV/s scan rate and in the blank  $\text{Na}_2\text{HPO}_4$  buffer solution. Afterward, the working electrode was transferred to the  $\text{Na}_2\text{HPO}_4$  buffer with  $\text{Cu}_n\text{-dap}$  (1 mM,  $n = 0\text{--}4$ ), and its polarization curve was measured with a 50 mV/s scan rate in the potential range from 0 to 1.2  $V_{\text{RHE}}$  at 25  $^\circ\text{C}$ . The oxygen evolution reaction (OER) was investigated by CV performed with a 5 mV/s scan rate for potentials ranging from 0 to 2  $V_{\text{RHE}}$  and with a 1,600 rpm rotation rate.

Differential electrochemical mass spectrometry (DEMS) equipped with a scanning flow cell (SFC) combined with a mass spectrometer (Max 300 LG, Extrel, PA, USA), was used for the online gas product analysis at 25  $^\circ\text{C}$  (Figure S30). The SFC was equipped with U-shaped

electrolyte channels and had an opening diameter of 1 cm at the bottom of the cell, where the cell made electrical contact with the GC working electrode. A 1 mm tip covered with a porous Teflon membrane, through which gas and volatile products can evaporate into the vacuum system of the mass spectrometer, was located *ca.* 100  $\mu\text{m}$  above the working electrode surface by controlling the thickness of the silicone sealing around the cell opening and the applied contact force. The contact between the SFC and working electrode and their distances were monitored by a digital microscope. An  $\text{O}_2$  ( $m/z = 32$ ) signal was detected during the OER measurement protocol performed with a 5 mV/s scan rate and in the potential range from 0 to 2  $V_{\text{RHE}}$ .

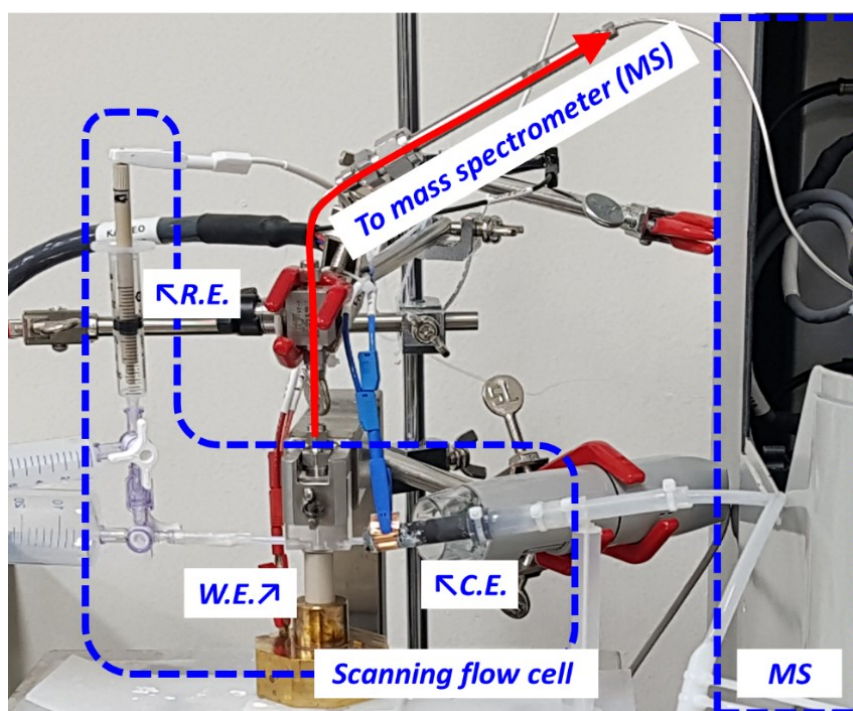

**Figure S30.** A digital photograph of the SFC/DEMS used in this study.

## 18. Differential pulse voltammetry (DPV)

Cu<sub>4</sub>-dap solution (1 mM) prepared in Na<sub>2</sub>HPO<sub>4</sub> buffer (0.1 M, pH 11.5,  $I = 0.44$  M) was transferred to an electrolysis cell equipped with GC electrode ( $S = 0.071$  cm<sup>2</sup>), Ag/AgCl (reference electrode), and Pt wire (counter electrode). The solution was thoroughly bubbled with N<sub>2</sub> to remove dissolved O<sub>2</sub>. DPV measurement was carried out using CHI760E potentiostat (CH Instruments, Inc., TX, US) with the following parameters: Increment  $E = 5$  mV, amplitude = 50 mV, pulse width = 0.05 s, sample width = 0.0167 s, pulse period = 0.5 s, quiet time = 2 s, sensitivity =  $10^{-5}$  A/V, and temperature = 25 °C.

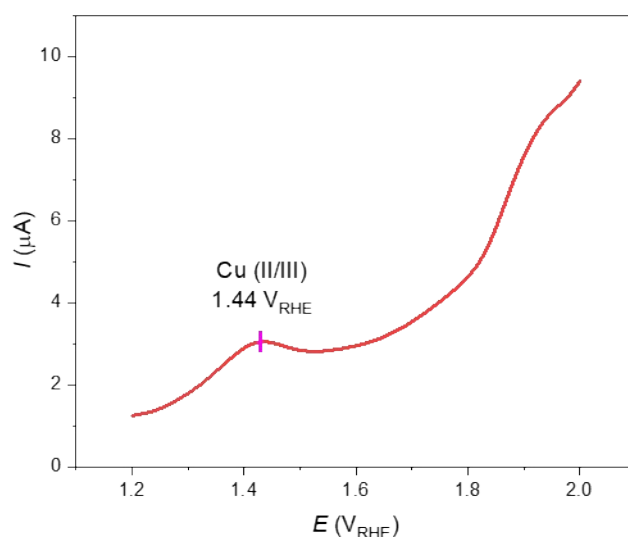

**Figure S31.** Differential pulse voltammogram of Cu<sub>4</sub>-dap (1 mM) in Na<sub>2</sub>HPO<sub>4</sub> buffer (0.1 M, pH 11.5,  $I = 0.44$  M).

## 19. The scan rate dependence of observed currents with Cu<sub>4</sub>-dap in CV

CV measurements of Cu<sub>4</sub>-dap were carried out at 25 °C with CHI760E potentiostat (CH Instruments, Inc., TX, US) with different scan rates (2–200 mV/s). Cu<sub>4</sub>-dap solution (1 mM) prepared in Na<sub>2</sub>HPO<sub>4</sub> buffer (0.1 M, pH 11.5, I = 0.44 M) was transferred to an electrolysis cell equipped with GC electrode (S = 0.071 cm<sup>2</sup>), Ag/AgCl (reference electrode), and Pt wire (counter electrode). The solution was bubbled with N<sub>2</sub> over 15 min to remove dissolved O<sub>2</sub>.

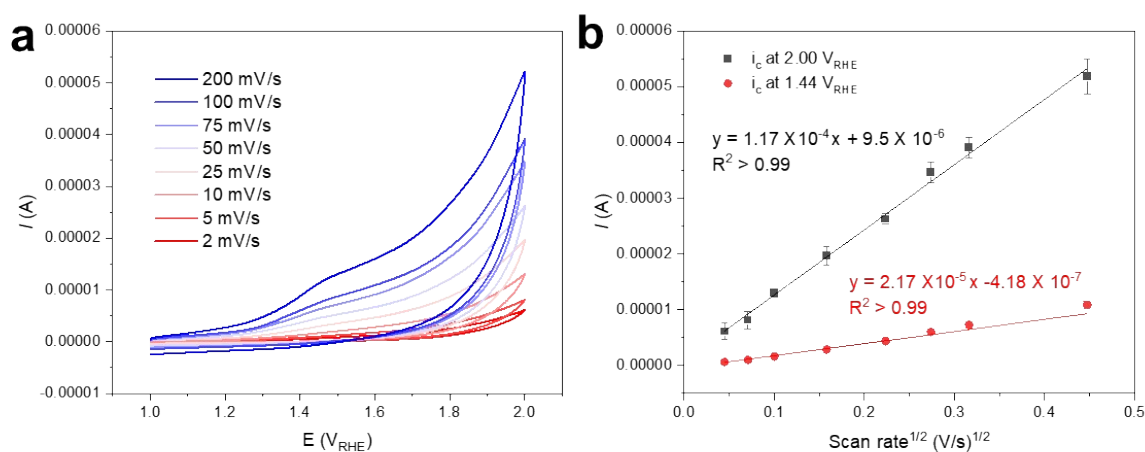

**Figure S32.** (a) Cyclic voltammograms of Cu<sub>4</sub>-dap with different scan rate (2–200 mV/s). (b) Plot of current versus scan rate<sup>1/2</sup> (V/s)<sup>1/2</sup>. After triplicated experiments, the standard deviations were calculated and used for error bars.

## 20. Faradaic efficiency evaluation during water electrolysis

As shown in Figure S33, Faradaic efficiency (FE) for O<sub>2</sub> formation was evaluated with a potentiostat (VMP3, Bio-Logic Science Ins., FR) in a two-compartment electrochemical cell, where the anode and cathode parts were separated by an ion-conducting membrane at 25 °C. The working electrode was a glassy carbon (GC) plate with an active surface area of 1 cm<sup>2</sup>, submerged in the anolyte of Na<sub>2</sub>HPO<sub>4</sub> buffer (0.1 M, pH 11.5, *I* = 0.44 M) containing Cu<sub>4</sub>-dap (1 mM). The saturated Ag/AgCl and graphite electrodes were used as reference and counter electrodes, respectively. The evolution of O<sub>2</sub> from water electrolysis was measured using a fiber-optic O<sub>2</sub> sensor (FireStingO<sub>2</sub>, PyroScience, Aachen, GE) at a potential of 1.9 V<sub>RHE</sub> for 1 h. Before the measurement, both anolyte and catholyte were vigorously purged with pure Ar gas. To prevent interference from the atmospheric O<sub>2</sub>, the electrochemical cell kept air-tight during the measurement. The oxygen was measured by the oxygen sensor in % and converted to μmol using a calibration curve. The calibration curve was constructed by the gradual addition of the known amount of pure oxygen (μmol) into the cell containing buffer solution using a Hamilton syringe while measuring the oxygen in % by the oxygen sensor and then by plotting the amount of pure oxygen added (μmol) versus the read of oxygen sensor (%) (Figure S34). Totally accumulated charge (Q) on GC plate with correction of background obtained from bare GC was 3.571 C for 1 h. Following Eq. S9, FE of 54% with Cu<sub>4</sub>-dap for O<sub>2</sub> formation was obtained (Figure S35).



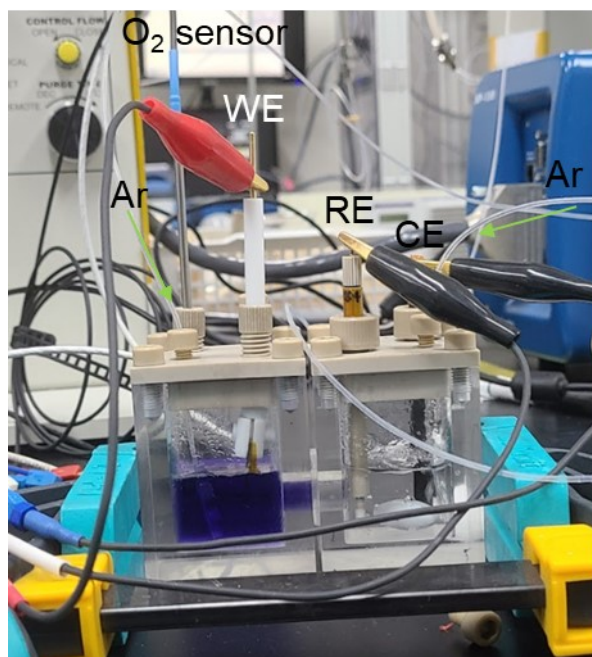

**Figure S33.** Photograph of air-tight electrolysis cell employed to measure FE for OER.

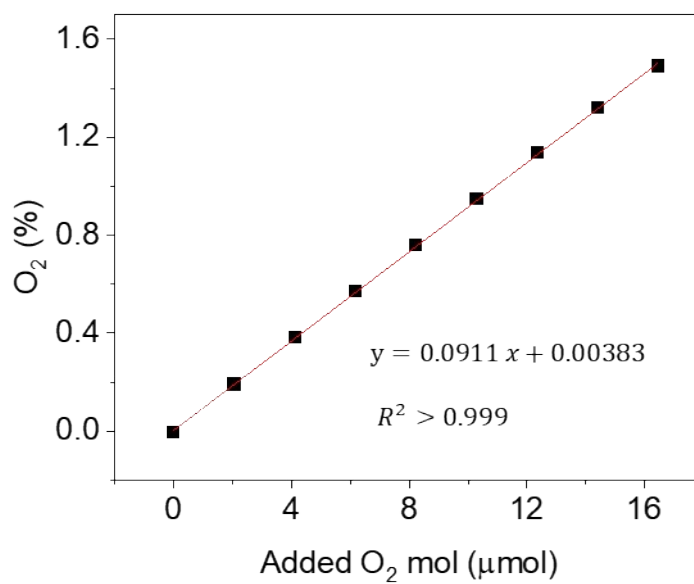

**Figure S34.** O<sub>2</sub> calibration curve to convert the read of the oxygen sensor (%) to the number of moles (μmol).

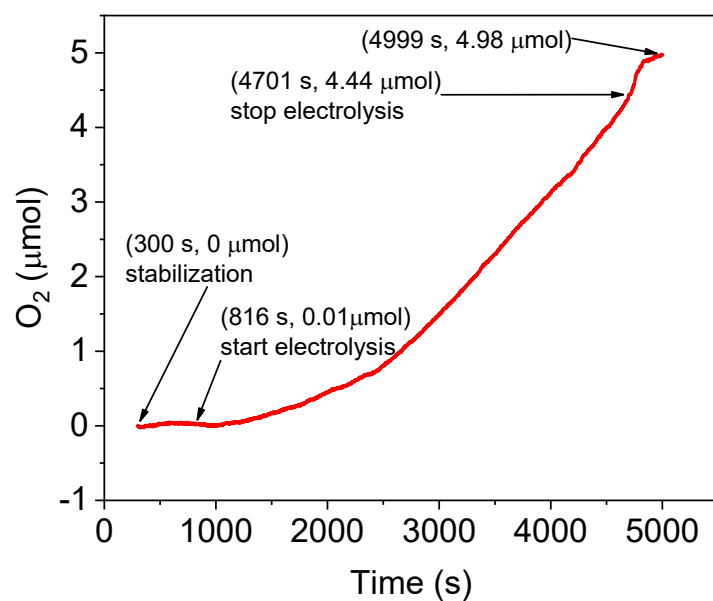

**Figure S35.** The amount of evolved O<sub>2</sub> under the applied potential of 1.9 V<sub>RHE</sub> measured for the Cu<sub>4</sub>-dap complex solution (1 mM) in Na<sub>2</sub>HPO<sub>4</sub> buffer (0.1 M, pH 11.5, I = 0.44 M) at 25 °C.

$$FE (\%) = \frac{4 \times O_2(\text{mol}) \times F}{Q} \times 100 \quad (\text{Eq. S9})$$

where, F = 96485.333 C/mol

## 21. *In situ* UV-vis spectroscopy

*In situ* UV-vis spectroscopy was conducted by measuring the UV-vis spectra during electrolysis using a UV-vis spectrometer (Genesis 180, Thermo-Fischer Scientific, US) equipped with a quartz cell (path length = 1 cm) at 25 °C. Electrolysis was carried out with a potentiostat (VMP3, Bio-Logic Science Ins., FR) and a carbon paper (working electrode, MGL 190, AvCarb, US) in the quartz cell equipped with a doubly separated Ag/AgCl reference electrode (RE-16 for strong alkaline media, polyether ether ketone body (PEEK), EC-Frontier) and a carbon paper counter electrode (MGL 190, AvCarb, US). The constant potential of 1.8 V<sub>RHE</sub> was applied into the Cu<sub>4</sub>-dap complex solution (0.25 mM) in Na<sub>2</sub>HPO<sub>4</sub> buffer (0.1 M, pH 11.5, I = 0.44 M) for 30 min at 25 °C.

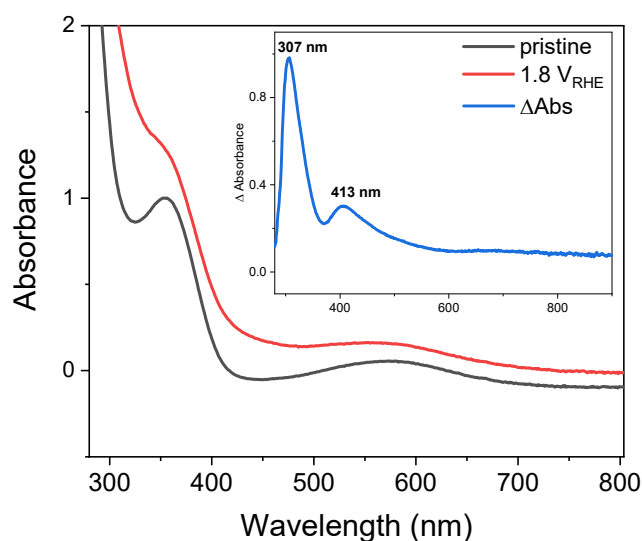

**Figure S36.** *In situ* UV-vis spectroscopy for Cu<sub>4</sub>-dap during OER. The UV-vis spectra of Cu<sub>4</sub>-dap (0.25 mM) were measured without an applied potential (black line) and with the applied potential of 1.8 V<sub>RHE</sub> (red line) in Na<sub>2</sub>HPO<sub>4</sub> buffer (0.1 M, pH 11.5, I = 0.44 M). The difference of absorbance was presented in blue line.

## 22. *In situ* Raman spectroscopy

All the *in situ* Raman experiments were performed at 25 °C with a Raman spectrometer (LabRAM HR Evolution, Horiba, JP) with a 50X long working distance visible objective. The wavelength of the excitation light source was 532 nm, with a spectral range of 200–1700  $\text{cm}^{-1}$ . To establish the reliability of the acquired Raman spectra, the Raman shift was accurately calibrated using a silicon standard sample (520.6  $\text{cm}^{-1}$ ). All the individual Raman spectra were obtained with an acquisition time of 300 s with a grating of 600 g/mm. *In situ* Raman experiments were performed with a three-electrode configuration and custom-made electrochemical cell at 25 °C. For the *in situ* measurements, glassy carbon electrodes with a thickness of 1 mm were used as the working electrode and  $\text{Cu}_4\text{-dap}$  complexes (5 mM in 0.1 M  $\text{Na}_2\text{HPO}_4$  buffer, pH 11.5,  $I = 0.44$  M) were prepared. The counter electrode was a platinum foil, and the reference electrode was Ag/AgCl (3.0 M NaCl, BASi, US). All the Raman spectra were collected at open circuit potential (OCP) and under individual applied potential where the chronoamperometry analyses were performed using a potentiostat (CHI 600E, CH Instruments, Inc., TX, US).

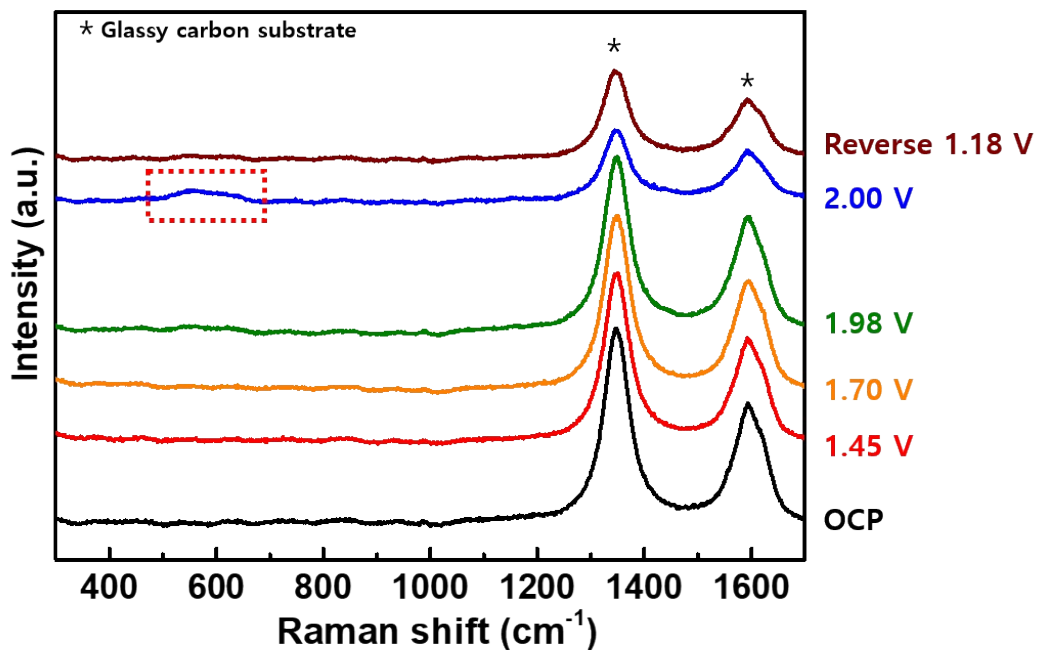

**Figure S37.** Potential-dependent *in situ* Raman spectra of Cu<sub>4</sub>-dap complexes (5 mM) upon increasing the applied potential from OCP to 2.0 V and at reversely applied potential in Na<sub>2</sub>HPO<sub>4</sub> buffer (0.1M, pH 11.5, *I* = 0.44 M). All the potentials are relative to RHE.

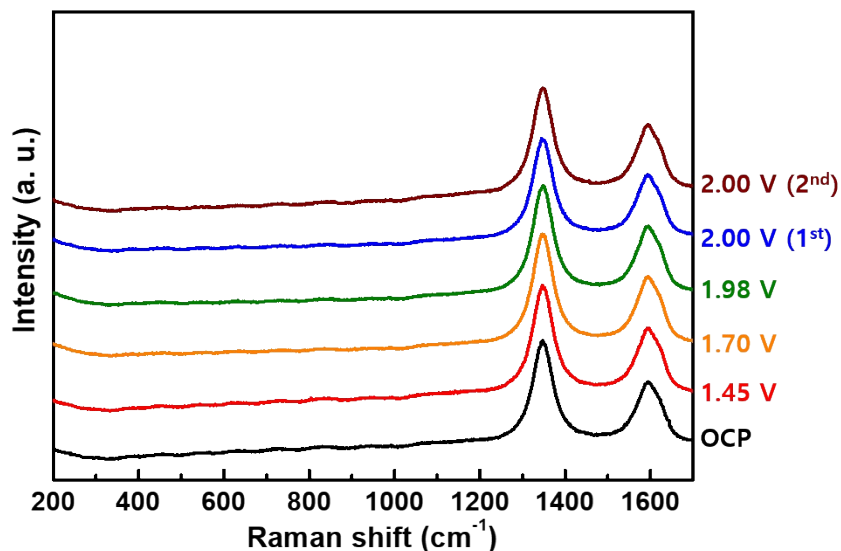

**Figure S38.** Potential-dependent *in situ* Raman spectra of Cu<sub>1</sub>-dap (5 mM) complexes upon increasing the applied potential from OCP to 2.0 V in Na<sub>2</sub>HPO<sub>4</sub> buffer (0.1M, pH 11.5, *I* = 0.44 M). No new peak was observed in Cu<sub>1</sub>-dap complexes. All the potentials are relative to RHE.

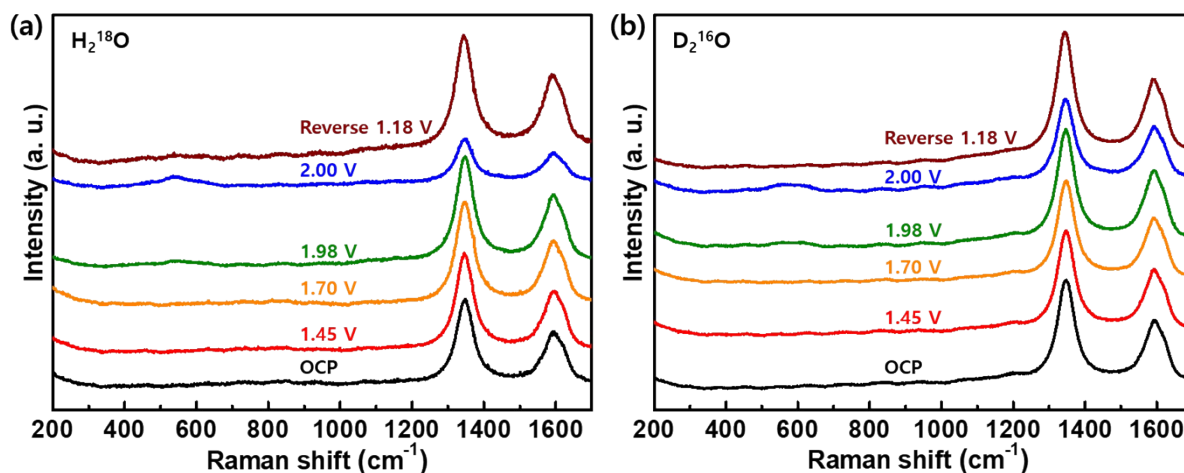

**Figure S39.** Potential-dependent *in situ* Raman spectra of  $\text{Cu}_4$ -dap complexes obtained in  $\text{Na}_2\text{HPO}_4$  buffer (0.1 M, pH 11.5,  $I = 0.44$  M) containing (a)  $\text{H}_2^{18}\text{O}$  and (b)  $\text{D}_2^{16}\text{O}$ . All the potentials are relative to RHE.

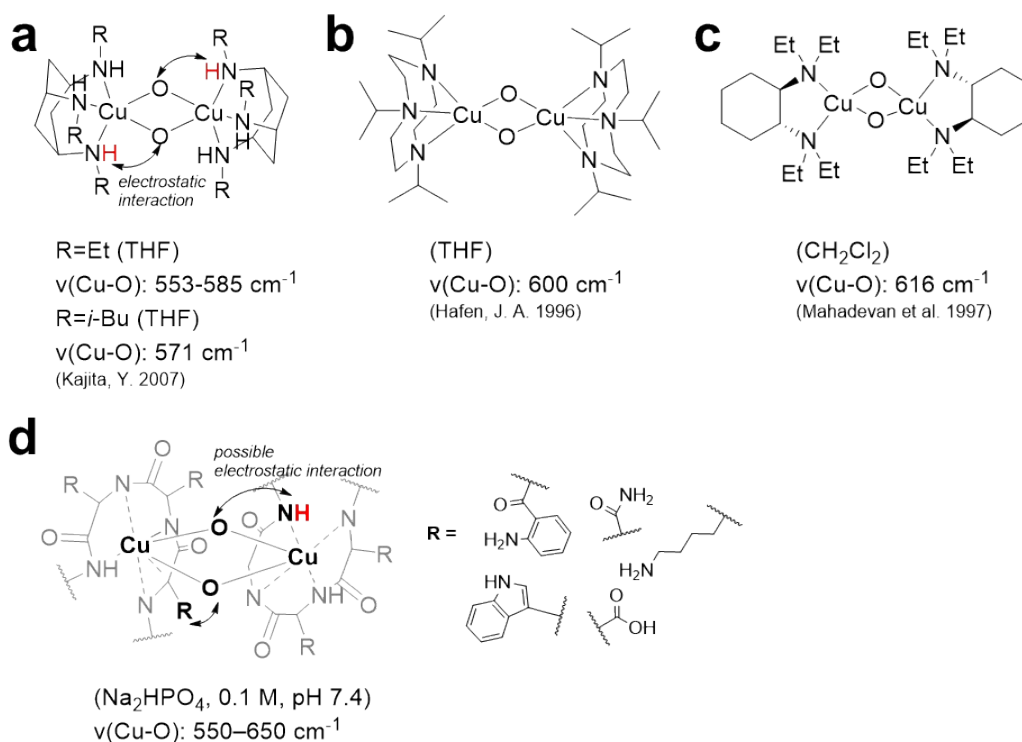

**Figure S40.** Previously assigned Raman shifts of  $\nu(\text{Cu-O})$  in *bis- $\mu$ -oxo- $\text{Cu}_2$*  complexes: (a)<sup>14</sup>, (b)<sup>28</sup> and (c)<sup>29</sup>. (d) The expected *bis- $\mu$ -oxo- $\text{Cu}_2$*  core on peptide backbone of daptomycin with additional interactions afforded by neighboring functional groups.

### 23. Kinetic isotope effect in CV measurement

CV analysis of Cu<sub>4</sub>-dap (1 mM) were carried out at 25 °C with H<sub>2</sub>O or D<sub>2</sub>O in Na<sub>2</sub>HPO<sub>4</sub> buffer (0.1 M) (pH 11.5 and pH\* 11.9 for buffer prepared in H<sub>2</sub>O and D<sub>2</sub>O, respectively) to evaluate the kinetic isotope effect of current density. An electrolysis cell equipped with a 3-electrode system (working electrode: GC (S= 0.071 cm<sup>2</sup>), reference electrode: Ag/AgCl, and counter electrode: Pt wire) and CHI760E potentiostat (CH Instruments, Inc., TX, US) were used to measure cyclic voltammograms at scan rate of 0.1 V/s.

### 24. A plausible reaction pathway for O–O bond formation mediated by Cu<sub>4</sub>-dap

A plausible OER mechanism, consistent with our spectroscopic and electrochemical analysis, is proposed on Figure S41. The proposed reaction pathway starts with two Cu(II)-OH sites in a resting state, revealed in the EPR analysis. In path *a*, these two sites will be oxidized to a high-valent Cu(III)-OH species without involvement of proton supported by the observed small KIE (1.1 for *i<sub>d</sub>*) for Cu(III) formation (Figure 5d). To form *bis-μ-oxo*-Cu<sub>2</sub> intermediate, observed using *in situ* Raman and UV-vis spectroscopy (Figures 5c and S36), we expected path *b* and *c*, which are responsible for Cu dimerization and deprotonation, respectively. Of course, a real reaction mechanism for path *b* and *c* might be composed of highly complicated kinetics due to a flexible and less defined nature of Cu<sub>n</sub>-dap complexes. In path *d*, the O–O bond formation may proceed without proton involvement by radical coupling (RC) in the Cu<sub>2</sub>O<sub>2</sub> cores providing *trans-μ-1,2-peroxo*-Cu<sub>2</sub> species, which is often suggested for homogeneous Cu electrocatalyst for OER.<sup>8, 10, 11, 19, 30-32</sup> This O–O bond formation mechanism is supported by the observed intermediates in the *in situ* Raman spectra (Figure 5c) and the negligible KIE (1.0 for *i<sub>c</sub>*) in the CVs (Figure 5d). After a further two-electron oxidation step, O<sub>2</sub> is produced, and the Cu(II)-OH moieties can be regenerated.

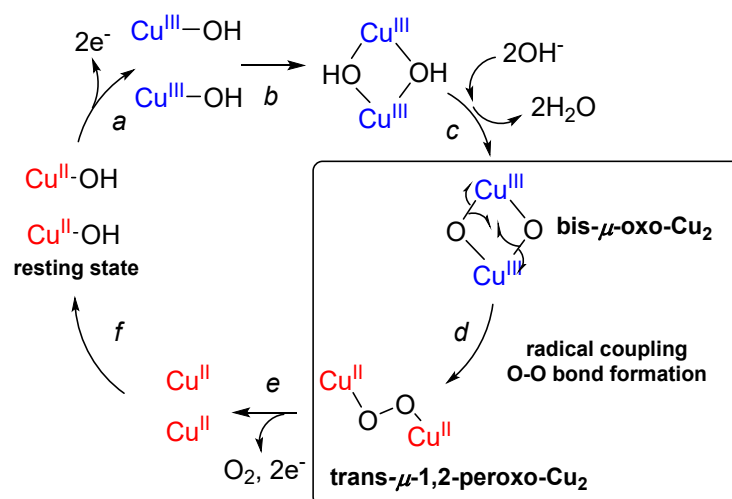

**Figure S41.** A plausible reaction pathway for O–O bond formation during electrochemical OER with Cu<sub>4</sub>-dap catalyst.

## 25. Reference

1. L. D. Pettit, K. J. Powell, R. W. Ramette and M. Koether, SolEq: solution equilibria, principles and applications (Freeware), Academic Software, Otley, U.K., 1999.
2. T. M. Powers, The Evans Method, <https://www.jove.com/science-education/10304>, (accessed 05-25-2021, 2021).
3. S. Stoll and A. Schweiger, EasySpin, a comprehensive software package for spectral simulation and analysis in EPR, *J. Magn. Reson.*, 2006, **178**, 42-55.
4. S. Yoganathan, N. Yin, Y. He, M. F. Mesleh, Y. G. Gu and S. J. Miller, An efficient chemical synthesis of carboxylate-isostere analogs of daptomycin, *Org. Biomol. Chem.*, 2013, **11**, 4680-4685.
5. K. Takehara and Y. Ide, Electrochemistry of Cu(II)-peptide complexes containing histidine residues II. Anomalous current fluctuation in the reduction process of Cu(II)-GGH, *Inorganica Chimica Acta*, 1991, **186**, 73-78.
6. C. Hureau, H. Eury, R. Guillot, C. Bijani, S. Sayen, P. L. Solari, E. Guillon, P. Faller and P. Dorlet, X-ray and solution structures of Cu(II) GHK and Cu(II) DAHK complexes: influence on their redox properties, *Chem. Eur. J.*, 2011, **17**, 10151-10160.
7. V. A. Streltsov, R. S. K. Ekanayake, S. C. Drew, C. T. Chantler and S. P. Best, Structural insight into redox dynamics of copper bound N-truncated amyloid-β peptides from *in situ* X-ray absorption spectroscopy, *Inorg. Chem.*, 2018, **57**, 11422-



- 11435.
8. T. T. Li and Y. Q. Zheng, Electrocatalytic water oxidation using a chair-like tetranuclear copper(II) complex in a neutral aqueous solution, *Dalton Trans.*, 2016, **45**, 12685-12690.
  9. F. Yu, F. Li, J. Hu, L. Bai, Y. Zhu and L. Sun, Electrocatalytic water oxidation by a macrocyclic Cu(II) complex in neutral phosphate buffer, *Chem. Commun.*, 2016, **52**, 10377-10380.
  10. X. J. Su, M. Gao, L. Jiao, R. Z. Liao, P. E. Siegbahn, J. P. Cheng and M. T. Zhang, Electrocatalytic water oxidation by a dinuclear copper complex in a neutral aqueous solution, *Angew. Chem. Int. Ed.*, 2015, **54**, 4909-4914.
  11. G. Ruan, P. Ghosh, N. Fridman and G. Maayan, A di-copper-peptoid in a noninnocent borate buffer as a fast electrocatalyst for homogeneous water oxidation with low overpotential, *J. Am. Chem. Soc.*, 2021, **143**, 10614-10623.
  12. M. T. Zhang, Z. Chen, P. Kang and T. J. Meyer, Electrocatalytic water oxidation with a copper(II) polypeptide complex, *J. Am. Chem. Soc.*, 2013, **135**, 2048-2051.
  13. S. M. Barnett, K. I. Goldberg and J. M. Mayer, A soluble copper-bipyridine water-oxidation electrocatalyst, *Nat. Chem.*, 2012, **4**, 498-502.
  14. Y. Kajita, H. Arai, T. Saito, Y. Saito, S. Nagatomo, T. Kitagawa, Y. Funahashi, T. Ozawa and H. Masuda, Syntheses, characterization, and dioxygen reactivities of Cu(I) complexes with *cis,cis*-1,3,5-triaminocyclohexane derivatives: a Cu(III)<sub>2</sub>O<sub>2</sub> intermediate exhibiting higher C-H activation, *Inorg. Chem.*, 2007, **46**, 3322-3335.
  15. D. Jiang, X. Li, L. Liu, G. B. Yagnik and F. Zhou, Reaction rates and mechanism of the ascorbic acid oxidation by molecular oxygen facilitated by Cu(II)-containing amyloid-beta complexes and aggregates, *J. Phys. Chem. B*, 2010, **114**, 4896-4903.
  16. D. Kim, N. H. Kim and S. H. Kim, 34 GHz pulsed ENDOR characterization of the copper coordination of an amyloid beta peptide relevant to Alzheimer's disease, *Angew. Chem. Int. Ed.*, 2013, **52**, 1139-1142.
  17. S. N. Semenov, L. Belding, B. J. Cafferty, M. P. S. Mousavi, A. M. Finogenova, R. S. Cruz, E. V. Skorb and G. M. Whitesides, Autocatalytic cycles in a copper-catalyzed azide-alkyne cycloaddition reaction, *J. Am. Chem. Soc.*, 2018, **140**, 10221-10232.
  18. R. Kotuniak, M. J. F. Strampraad, K. Bossak-Ahmad, U. E. Wawrzyniak, I. Ufnalska, P. L. Hagedoorn and W. Bal, Key intermediate species reveal the Copper(II)-exchange pathway in biorelevant ATCUN/NTS complexes, *Angew. Chem. Int. Ed.*,

- 2020, **59**, 11234-11239.
19. J. Shen, M. Wang, P. Zhang, J. Jiang and L. Sun, Electrocatalytic water oxidation by copper(II) complexes containing a tetra- or pentadentate amine-pyridine ligand, *Chem. Commun.*, 2017, **53**, 4374-4377.
  20. T. Ghosh, P. Ghosh and G. Maayan, A copper-peptoid as a highly stable, efficient, and reusable homogeneous water oxidation electrocatalyst, *ACS Catal.*, 2018, **8**, 10631-10640.
  21. J. T. Pedersen, S. W. Chen, C. B. Borg, S. Ness, J. M. Bahl, N. H. Heegaard, C. M. Dobson, L. Hemmingsen, N. Cremades and K. Teilum, Amyloid- $\beta$  and  $\alpha$ -synuclein decrease the level of metal-catalyzed reactive oxygen species by radical scavenging and redox silencing, *J. Am. Chem. Soc.*, 2016, **138**, 3966-3969.
  22. S. Thanneeru, N. Milazzo, A. Lopes, Z. Wei, A. M. Angeles-Boza and J. He, Synthetic polymers to promote cooperative Cu activity for O<sub>2</sub> activation: Poly vs Mono, *J. Am. Chem. Soc.*, 2019, **141**, 4252-4256.
  23. O. V. Makhlynets, P. M. Gosavi and I. V. Korendovych, Short self-assembling peptides are able to bind to copper and activate oxygen, *Angew. Chem. Int. Ed.*, 2016, **55**, 9017-9020.
  24. B. Yang, Y. Chen and J. Shi, Reactive oxygen species (ROS)-based nanomedicine, *Chem. Rev.*, 2019, **119**, 4881-4985.
  25. K. P. Neupane, A. R. Aldous and J. A. Kritzer, Macrocyclization of the ATCUN motif controls metal binding and catalysis, *Inorg. Chem.*, 2013, **52**, 2729-2735.
  26. K. J. J. Mayrhofer, A. S. Crampton, G. K. H. Wiberg and M. Arenz, Analysis of the impact of individual glass constituents on electrocatalysis on Pt electrodes in alkaline solution, *J. Electrochem. Soc.*, 2008, **155**, 78-81.
  27. K. J. J. Mayrhofer, G. K. H. Wiberg and M. Arenz, Impact of glass corrosion on the electrocatalysis on Pt electrodes in alkaline electrolyte, *J. Electrochem. Soc.*, 2008, **155**, 1-5.
  28. J. A. Halfen, S. Mahapatra, E. C. Wilkinson, S. Kaderli, V. G. Young, L. Que, A. D. Zuberbuhler and W. B. Tolman, Reversible cleavage and formation of the dioxygen O–O band within a dicopper complex, *Science*, 1996, **271**, 1397-1400.
  29. V. Mahadevan, Z. Hou, A. P. Cole, D. E. Root, T. K. Lal, E. I. Solomon and T. D. P. Stack, Irreversible reduction of dioxygen by simple peralkylated diamine–copper(I) complexes: characterization and thermal stability of a [Cu<sub>2</sub>( $\mu$ -O)<sub>2</sub>]<sup>2+</sup>Core, *J. Am.*

*Chem. Soc.*, 1997, **119**, 11996-11997.

30. S. J. Koepke, K. M. Light, P. E. VanNatta, K. M. Wiley and M. T. Kieber-Emmons, Electrocatalytic water oxidation by a homogeneous copper catalyst disfavors single-site mechanisms, *J. Am. Chem. Soc.*, 2017, **139**, 8586-8600.
31. X. P. Zhang, A. Chandra, Y. M. Lee, R. Cao, K. Ray and W. Nam, Transition metal-mediated O–O bond formation and activation in chemistry and biology, *Chem. Soc. Rev.*, 2021, **50**, 4804-4811.
32. M. Okamura, M. Kondo, R. Kuga, Y. Kurashige, T. Yanai, S. Hayami, V. K. Praneeth, M. Yoshida, K. Yoneda, S. Kawata and S. Masaoka, A pentanuclear iron catalyst designed for water oxidation, *Nature*, 2016, **530**, 465-468.
